# Supplementary material for: Comparative effectiveness of common treatments for new-onset atrial fibrillation within the ICU: Accounting for physiological status
Source: PubMed Central journal article supplement (PMC8687206; doi:10.1016/j.jcrc.2021.11.005), 2022-02
Supplement: mmc1.pdf [file mmc1.pdf]

# Additional File 1

## Expert panel details and research recommendations

| Name                             | Role                                           | Institution                                      |
|----------------------------------|------------------------------------------------|--------------------------------------------------|
| <b>Professor Peter Watkinson</b> | Associate professor of intensive care medicine | University of Oxford                             |
| <b>Dr Jonathan Bedford</b>       | Clinical Research Fellow                       | University of Oxford                             |
| <b>Dr Andrew Walden</b>          | Consultant in intensive care medicine          | Intensive care unit, Royal Berkshire Hospital    |
| <b>Professor Ben O'Brien</b>     | Professor of Perioperative Medicine            | St Bartholomew's Hospital & Barts Heart Centre   |
| <b>Kim Rajappan</b>              | Consultant in cardiology                       | Oxford University Hospitals NHS Foundation Trust |
| <b>Ian Taylor</b>                | Lay representative                             | N/A                                              |
| <b>Cathy Taylor</b>              | Lay representative                             | N/A                                              |

## Treatments and confounding variables

The following lists were drawn initially from the scoping review, then refined and ratified by the expert panel.

### 1 Treatments of interest

---

#### 1.1 Treatments to be included in the analysis

- **Amiodarone IV**
- **Beta blockers IV**
  - Labetalol
  - Esmolol
  - Metoprolol
- **Calcium channel blockers IV**
  - Diltiazem
  - Verapamil
- **Digoxin IV**
- **Electrical cardioversion**

#### Treatments of interest but not possible with our data

Propafenone and ibutilide: identified as candidate therapies in scoping review, however these were not available in our datasets.

## 2 Confounding / matching variables

---

### 2.1 Demographic / Comorbid factors

- Age
- Sex
- Congestive cardiac failure
- COPD (previous or current diagnosis)
- Liver disease (previous or current diagnosis)
- Chronic renal failure
- Thyroid disorders (previous or current diagnosis, or taking relevant medications)
- Pre-admission beta blockers
- Pre-admission antipsychotic medication

### 2.2 Admission factors

- Illness severity in first 3h (therefore not influenced by NOAF (as we are excluding pts in AF in first 3h)).

### 2.3 Factors at the time of NOAF onset

- Heart rate<sup>°</sup>
- Blood pressure<sup>°</sup>
- Body temperature<sup>°</sup>
- Presence of vasopressor / inotrope<sup>°</sup>
- Dose of noradrenaline<sup>°</sup>
- Dose of vasopressin<sup>°</sup>
- White cell count<sup>L</sup>
- Plasma electrolyte (K, Mg, Na, Ca) concentrations<sup>L</sup>
- Plasma urea and creatinine concentrations<sup>L</sup>
- Platelet count<sup>L</sup>
- Prothrombin time<sup>L</sup>
- Presence of therapeutic dose anticoagulation\*
- Presence of bronchodilator therapy\*
- Mechanical ventilation<sup>%</sup>
- Haemofiltration<sup>§</sup>
- Presence of central venous access<sup>%</sup>

<sup>°</sup>First recording after AF onset

<sup>L</sup>Most recent value in ICU prior to AF onset

\*On the calendar day of, or the day preceding NOAF onset

<sup>%</sup>At the time of NOAF onset
