# Supplementary material for: Comparative effectiveness of common treatments for new-onset atrial fibrillation within the ICU: Accounting for physiological status
Source: PubMed Central journal article supplement (PMC8687206; doi:10.1016/j.jcrc.2021.11.005), 2022-02
Supplement: mmc2.pdf [file mmc2.pdf]

# Additional File 2

## Supplementary data

### Contents

|                                                                                                                                                  |    |
|--------------------------------------------------------------------------------------------------------------------------------------------------|----|
| Study population .....                                                                                                                           | 4  |
| Supplemental Table S1 - Characteristics of patients with NOAF vs without NOAF: MIMIC database.....                                               | 4  |
| Supplemental Table S2 - Characteristics of patients with NOAF vs those without: PICRAM database.....                                             | 4  |
| Supplemental Figure S1 - Time from ICU admission to NOAF onset in treated patients.....                                                          | 5  |
| Supplemental Figure S2 - Total duration of AF per treated patient.....                                                                           | 6  |
| Rate control.....                                                                                                                                | 6  |
| Supplemental Figure S3 - Distribution of heart rate post AF onset: MIMIC-III database .....                                                      | 7  |
| Supplemental Figure S4 - Distribution of heart rate post AF onset: MIMIC-III database .....                                                      | 8  |
| NOAF treatments .....                                                                                                                            | 9  |
| Supplemental Table S3 - Characteristics of included patients by treatment group: MIMIC-III database.....                                         | 9  |
| Supplemental Table S4 - Characteristics of included patients by treatment group: PICRAM database.....                                            | 10 |
| Supplemental Figure S5 - Cumulative incidence plot of time from treatment to heart rate <110 for each treatment: MIMIC database .....            | 12 |
| Supplemental Figure S6 - Cumulative incidence plot of time from treatment to heart rate <110 for each treatment: PICRAM database .....           | 12 |
| Supplemental Figure S7 - Kaplan-Meier curves of time from achieving rate control to reversion to heart rate $\geq 110$ : MIMIC-III database..... | 13 |
| Supplemental Figure S8 - Kaplan-Meier curves of time from achieving rate control to reversion to heart rate $\geq 110$ : PICRAM database .....   | 13 |
| Supplemental Figure S9 - Cumulative incidence plot of time from treatment to rhythm control for each treatment: MIMIC database .....             | 14 |

|                                                                                                                                                                              |    |
|------------------------------------------------------------------------------------------------------------------------------------------------------------------------------|----|
| Supplemental Figure S10 - Cumulative incidence plot of time from treatment to rhythm control for each treatment: PICRAM database .....                                       | 14 |
| Supplemental Figure S11 - Kaplan-Meier curves for each treatment of time from achieving rhythm control to reversion to AF: MIMIC-III database .....                          | 15 |
| Supplemental Figure S12 - Kaplan-Meier curves for each treatment of time from achieving rhythm control to reversion to AF: PICRAM database .....                             | 15 |
| Survival .....                                                                                                                                                               | 16 |
| Supplemental Figure S13 - Kaplan-Meier survival curves for each treatment group: MIMIC-III database .....                                                                    | 16 |
| Supplemental Figure S14 - Kaplan-Meier survival curves for each treatment group: PICRAM database .....                                                                       | 16 |
| Adjustment for confounding .....                                                                                                                                             | 17 |
| Supplemental Table S5 - Unweighted and weighted covariate means by treatment group: MIMIC-III database .....                                                                 | 18 |
| Supplemental Table S6 - Unweighted and weighted covariate means by treatment group: PICRAM database .....                                                                    | 20 |
| Supplemental Table S7 - Unweighted and weighted covariate means by treatment group: Combined databases .....                                                                 | 23 |
| Supplemental Figure S15 - Histograms of propensity weights by treatment group: MIMIC-III database .....                                                                      | 25 |
| Supplemental Figure S16 - Histograms of propensity weights by treatment group: PICRAM database .....                                                                         | 25 |
| Supplemental Figure S17 - Histograms of propensity weights by treatment group: Combined dataset .....                                                                        | 26 |
| Outcomes .....                                                                                                                                                               | 27 |
| Supplemental Table S8 - Unadjusted and adjusted hazard ratios for each outcome (compared with amiodarone) and associated 95% confidence intervals: MIMIC-III database .....  | 27 |
| Supplemental Table S9 - Unadjusted and adjusted hazard ratios (compared with amiodarone) for each outcome and associated 95% confidence intervals: PICRAM database .....     | 27 |
| Supplemental Table S10 - Unadjusted and adjusted hazard ratios for each outcome (compared with amiodarone) and associated 95% confidence intervals: Combined databases ..... | 28 |

|                                                                                       |    |
|---------------------------------------------------------------------------------------|----|
| Missingness of variables .....                                                        | 28 |
| Supplemental Table S11 - Missingness of weighting variables: MIMIC-III database ..... | 28 |
| Supplemental Table S12 - Missingness of matching variables: PICRAM database.....      | 28 |

## Study population

Supplemental Table S1 - Characteristics of patients with NOAF vs without NOAF: MIMIC database

| <b>Characteristic</b>       | <b>Without NOAF, N = 17,494</b> | <b>NOAF, N = 1,065</b> |
|-----------------------------|---------------------------------|------------------------|
| Age                         | 59 (47, 73)                     | 75 (64, 83)            |
| Sex                         |                                 |                        |
| F                           | 8,440 (48%)                     | 518 (49%)              |
| M                           | 9,054 (52%)                     | 547 (51%)              |
| Weight (Kg)                 | 77 (64, 91)                     | 77 (65, 92)            |
| ICU length of stay (d)      | 1.8 (1.0, 3.5)                  | 5.8 (3.0, 11.8)        |
| ICU mortality               | 1,260 (7.2%)                    | 265 (25%)              |
| Hospital length of stay (d) | 6 (4, 12)                       | 12 (7, 21)             |
| Hospital mortality          | 1,887 (11%)                     | 347 (33%)              |

Continuous variables are summarised as Median (IQR); Categorical variables are summarised as n (%)

Supplemental Table S2 - Characteristics of patients with NOAF vs those without: PICRAM database

| <b>Characteristic</b>        | <b>Never AF, N = 7,415</b> | <b>NOAF, N = 952</b> |
|------------------------------|----------------------------|----------------------|
| Age                          | 61 (45, 71)                | 71 (64, 78)          |
| Sex                          |                            |                      |
| F                            | 3,120 (42%)                | 368 (39%)            |
| M                            | 4,295 (58%)                | 584 (61%)            |
| Weight (Kg)                  | 72 (62, 83)                | 75 (65, 85)          |
| ICU length of stay (d)       | 2.4 (1.5, 4.7)             | 6.1 (3.1, 12.8)      |
| ICU mortality                | 628 (8.5%)                 | 193 (20%)            |
| Hospital length of stay (d)* | 13 (7, 25)                 | 19 (10, 40)          |
| Hospital mortality           | 1,122 (16%)                | 350 (37%)            |

Continuous variables are summarised as Median (IQR); Categorical variables are summarised as n (%).

\*32 patients for whom hospital length of stay unknown not included.

## Characteristics of new-onset atrial fibrillation in treated patients

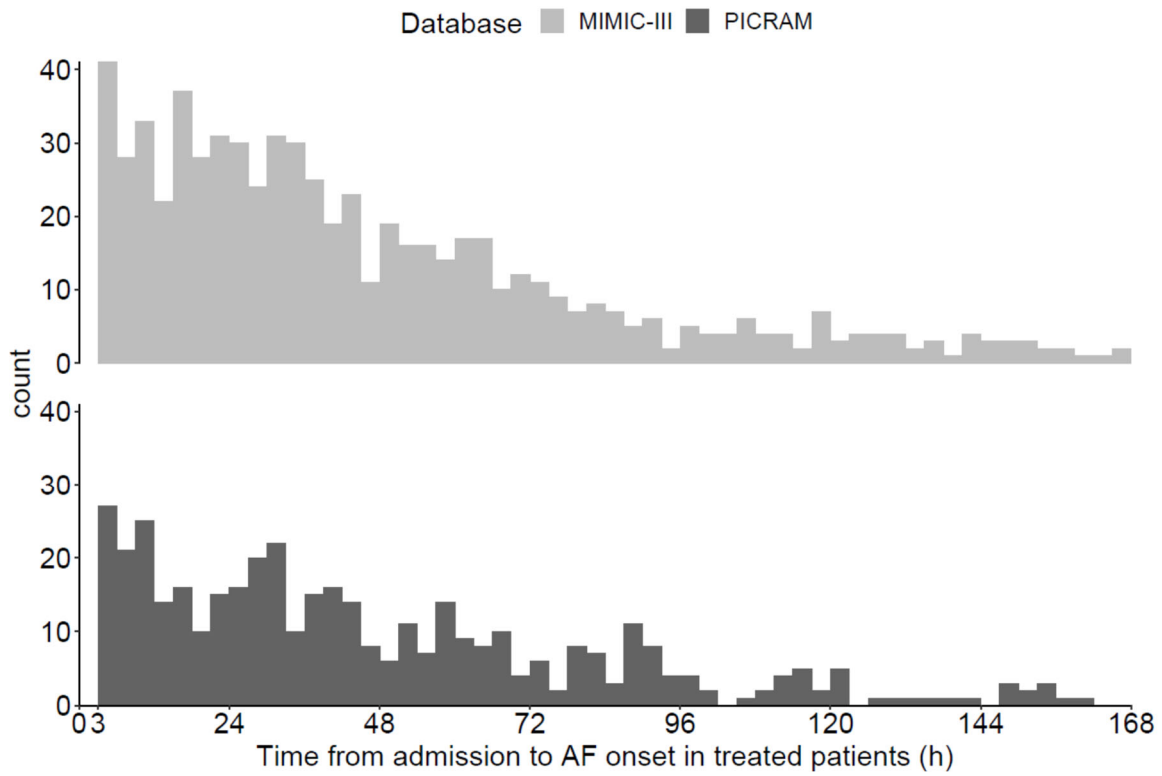

Supplemental Figure S1 - Time from ICU admission to NOAF onset in treated patients.

Data from 93 patients with time to AF onset >168h (7 days) not shown

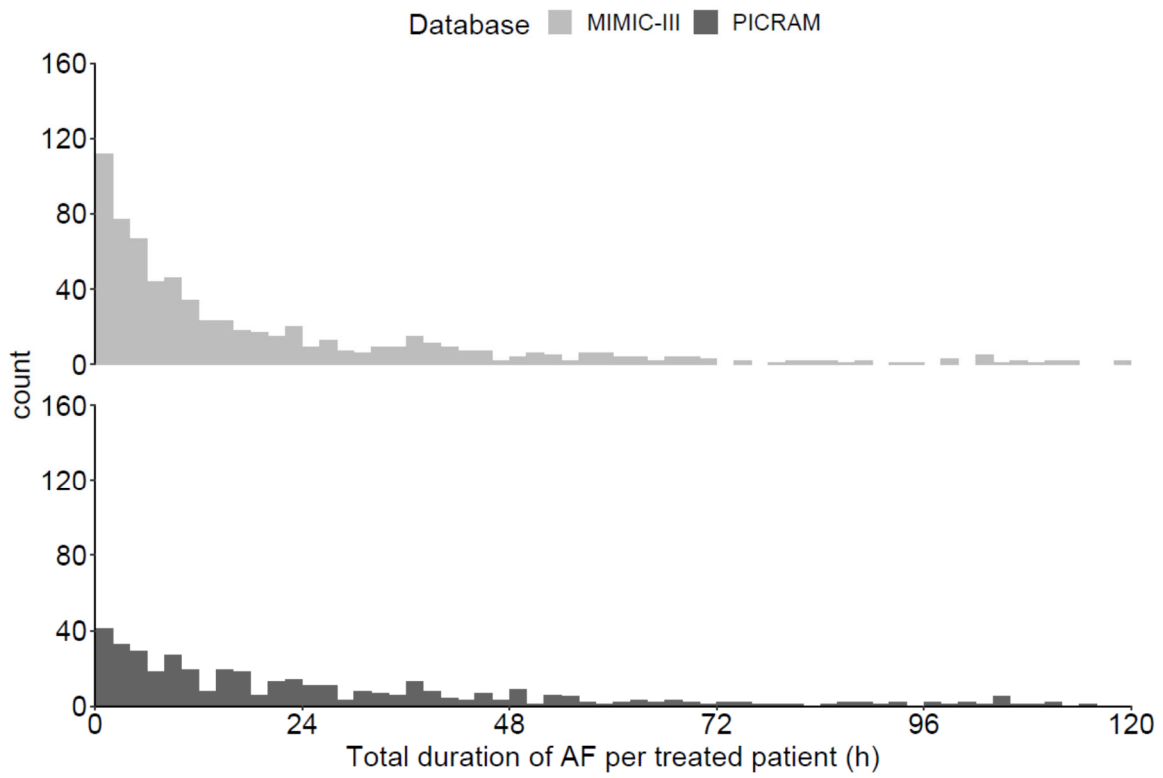

Supplemental Figure S2 - Total duration of AF per treated patient.  
Data from 89 patients with AF duration >120h (5 days) not shown

**Rate control**

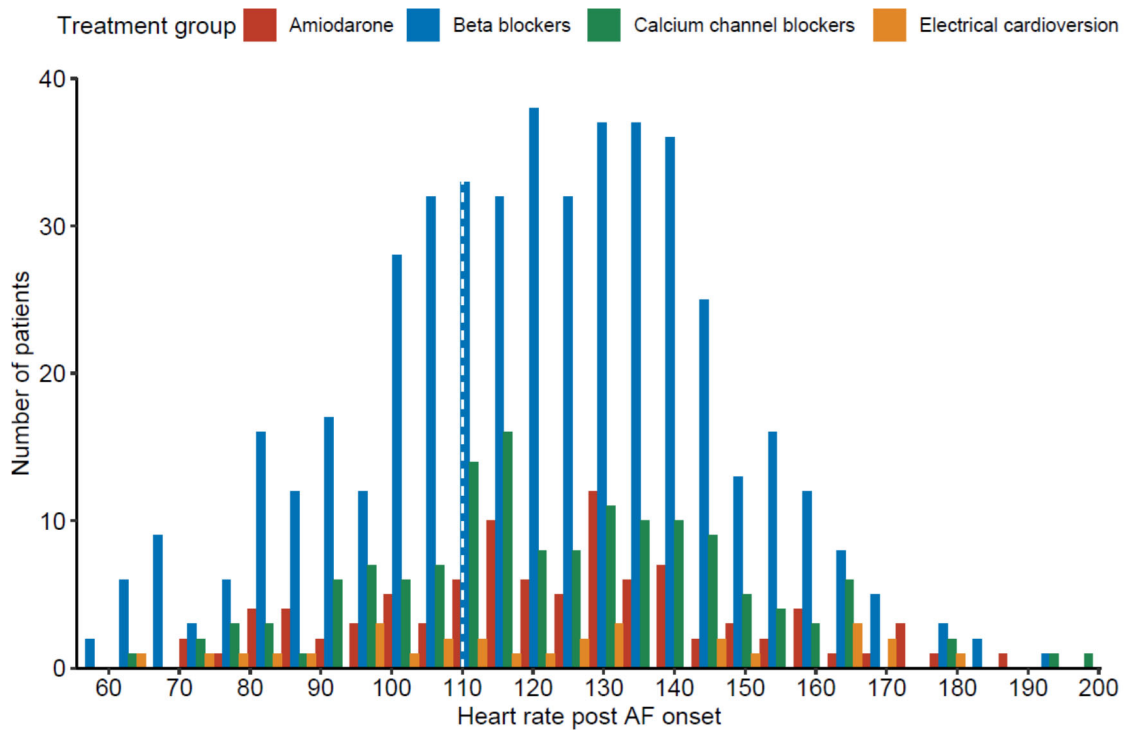

Supplemental Figure S3 - Distribution of heart rate post AF onset: MIMIC-III database

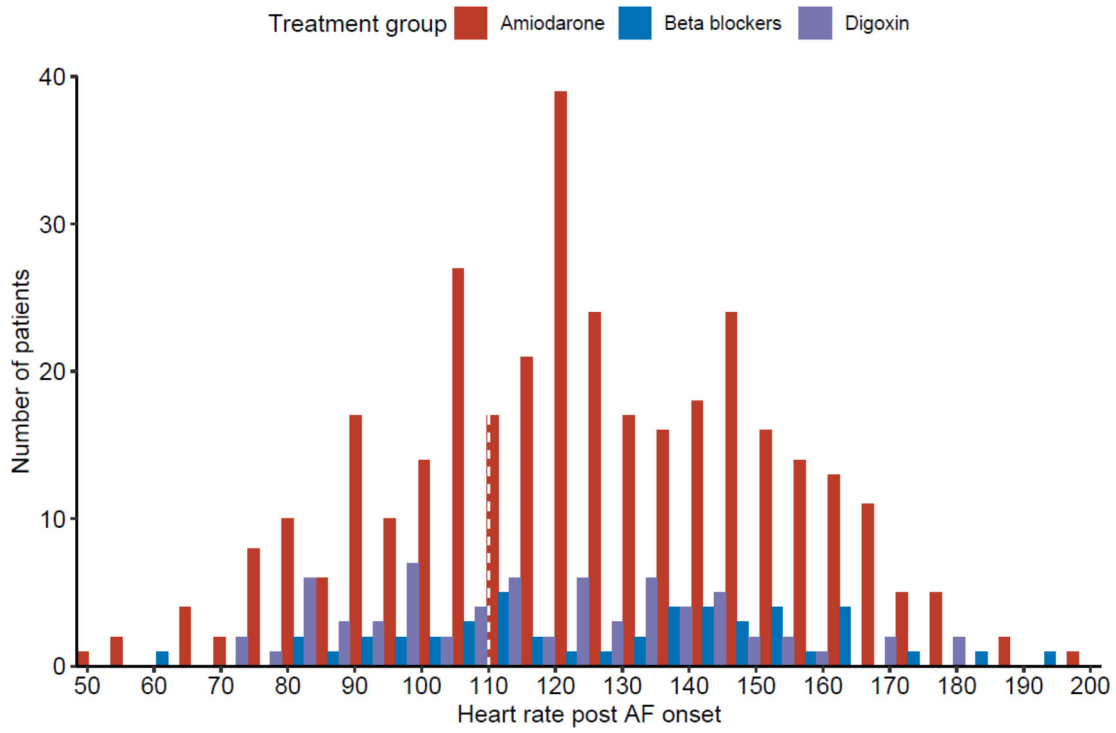

Supplemental Figure S4 - Distribution of heart rate post AF onset: MIMIC-III database



## NOAF treatments

Supplemental Table S3 - Characteristics of included patients by treatment group: MIMIC-III database

| Characteristic                                           | Overall,<br>N = 740 | Amiodarone,<br>N = 94 | Beta<br>blocker, N<br>= 473 | Calcium<br>channel<br>blocker, N =<br>144 | DC<br>cardioversion,<br>N = 29 |
|----------------------------------------------------------|---------------------|-----------------------|-----------------------------|-------------------------------------------|--------------------------------|
| Age                                                      | 74 (64, 82)         | 76 (63, 83)           | 73 (64, 83)                 | 73 (65, 81)                               | 77 (69, 85)                    |
| Sex                                                      |                     |                       |                             |                                           |                                |
| F                                                        | 372 (50%)           | 51 (54%)              | 234 (49%)                   | 77 (53%)                                  | 10 (34%)                       |
| M                                                        | 368 (50%)           | 43 (46%)              | 239 (51%)                   | 67 (47%)                                  | 19 (66%)                       |
| COPD                                                     | 53 (7.2%)           | 3 (3.2%)              | 28 (5.9%)                   | 19 (13%)                                  | 3 (10%)                        |
| NYHA class III/IV heart failure                          | 0 (0%)              | 0 (0%)                | 0 (0%)                      | 0 (0%)                                    | 0 (0%)                         |
| Dialysis-dependent renal failure                         | 1 (0.1%)            | 0 (0%)                | 1 (0.2%)                    | 0 (0%)                                    | 0 (0%)                         |
| Chronic liver disease                                    | 11 (1.5%)           | 2 (2.1%)              | 7 (1.5%)                    | 2 (1.4%)                                  | 0 (0%)                         |
| Thyroid disorder                                         | 33 (4.5%)           | 2 (2.1%)              | 27 (5.7%)                   | 3 (2.1%)                                  | 1 (3.4%)                       |
| Beta blocker therapy prior to admission                  | 281 (42%)           | 38 (46%)              | 193 (45%)                   | 37 (28%)                                  | 13 (52%)                       |
| Antipsychotic medication prior to admission              | 27 (4.0%)           | 4 (4.8%)              | 19 (4.4%)                   | 4 (3.1%)                                  | 0 (0%)                         |
| Highest OASIS Score at 3h                                | 36 (31, 41)         | 38 (32, 43)           | 36 (31, 40)                 | 36 (30, 40)                               | 40 (33, 43)                    |
| Mechanical ventilation at time of NOAF                   | 343 (46%)           | 60 (64%)              | 206 (44%)                   | 55 (38%)                                  | 22 (76%)                       |
| Renal replacement therapy during or <12h prior to NOAF   | 47 (6.4%)           | 5 (5.3%)              | 38 (8.0%)                   | 1 (0.7%)                                  | 3 (10%)                        |
| IV Vasoactive medication at time of NOAF                 | 101 (14%)           | 34 (36%)              | 45 (9.5%)                   | 9 (6.2%)                                  | 13 (45%)                       |
| Therapeutic anticoagulation at time of NOAF              | 36 (4.9%)           | 6 (6.4%)              | 23 (4.9%)                   | 5 (3.5%)                                  | 2 (6.9%)                       |
| Central venous catheter at time of NOAF                  | 429 (58%)           | 69 (73%)              | 261 (55%)                   | 75 (52%)                                  | 24 (83%)                       |
| Bronchodilator therapy on day of, or day preceding, NOAF | 258 (35%)           | 33 (35%)              | 155 (33%)                   | 62 (43%)                                  | 8 (28%)                        |
| Plasma sodium concentration (mmol/L)                     | 139 (136, 143)      | 138 (136, 141)        | 140 (137, 143)              | 140 (137, 143)                            | 138 (136, 143)                 |

|                                              |                   |                   |                   |                   |                   |
|----------------------------------------------|-------------------|-------------------|-------------------|-------------------|-------------------|
| Plasma potassium concentration (mmol/L)      | 4.0 (3.7, 4.4)    | 4.0 (3.7, 4.5)    | 3.9 (3.6, 4.3)    | 4.0 (3.7, 4.3)    | 4.1 (3.7, 4.4)    |
| Plasma magnesium concentration (mmol/L)      | 0.82 (0.78, 0.95) | 0.86 (0.78, 0.95) | 0.82 (0.78, 0.95) | 0.86 (0.78, 0.95) | 0.82 (0.78, 0.91) |
| Plasma urea concentration (mmol/L)           | 9.3 (6.1, 16.1)   | 10.0 (6.4, 15.4)  | 8.9 (5.7, 15.7)   | 8.9 (6.1, 15.4)   | 19.8 (9.5, 23.8)  |
| Plasma creatinine concentration (micromol/L) | 97 (62, 159)      | 97 (71, 168)      | 97 (62, 159)      | 88 (62, 139)      | 159 (86, 270)     |
| White cell count (x10 <sup>9</sup> / L)      | 11.8 (8.5, 16.1)  | 13.6 (8.8, 19.7)  | 11.6 (8.8, 15.5)  | 11.3 (7.5, 16.3)  | 13.1 (10.5, 16.3) |
| Haemoglobin concentration (g/L)              | 102 (92, 115)     | 100 (88, 113)     | 104 (92, 115)     | 101 (93, 116)     | 99 (91, 111)      |
| Platelet count (x10 <sup>9</sup> / L)        | 190 (123, 283)    | 179 (91, 258)     | 190 (129, 286)    | 205 (137, 291)    | 161 (111, 219)    |
| Prothrombin time (s)                         | 14.2 (13.1, 16.4) | 15.2 (13.7, 17.8) | 14.2 (13.1, 16.3) | 14.0 (12.9, 15.6) | 15.0 (13.6, 17.5) |
| Systolic blood pressure after AF onset       | 116 (100, 135)    | 103 (93, 122)     | 119 (104, 140)    | 115 (97, 132)     | 93 (88, 111)      |
| Mean blood pressure after AF onset           | 78 (67, 90)       | 72 (63, 81)       | 80 (69, 92)       | 76 (66, 88)       | 67 (61, 78)       |
| Heart rate after AF onset                    | 122 (104, 137)    | 124 (110, 139)    | 121 (102, 136)    | 124 (110, 141)    | 123 (98, 147)     |

Supplemental Table S4 - Characteristics of included patients by treatment group: PICRAM database

| Characteristic                                         | Overall, N = 460 | Amiodarone, N = 344 | Beta blocker, N = 47 | Digoxin, N = 69 |
|--------------------------------------------------------|------------------|---------------------|----------------------|-----------------|
| Age                                                    | 70 (63, 77)      | 69 (63, 77)         | 70 (64, 76)          | 75 (65, 81)     |
| Sex                                                    |                  |                     |                      |                 |
| F                                                      | 186 (40%)        | 141 (41%)           | 20 (43%)             | 25 (36%)        |
| M                                                      | 274 (60%)        | 203 (59%)           | 27 (57%)             | 44 (64%)        |
| COPD                                                   | 63 (14%)         | 51 (15%)            | 1 (2.1%)             | 11 (16%)        |
| NYHA class III/IV heart failure                        | 2 (0.4%)         | 2 (0.6%)            | 0 (0%)               | 0 (0%)          |
| Dialysis-dependent renal failure                       | 7 (1.5%)         | 6 (1.7%)            | 0 (0%)               | 1 (1.4%)        |
| Chronic liver disease                                  | 20 (4.3%)        | 14 (4.1%)           | 1 (2.1%)             | 5 (7.2%)        |
| Thyroid disorder                                       | 28 (6.1%)        | 21 (6.1%)           | 3 (6.4%)             | 4 (5.8%)        |
| Beta blocker therapy prior to admission                | 63 (14%)         | 44 (13%)            | 10 (21%)             | 9 (13%)         |
| Antipsychotic medication prior to admission            | 7 (1.5%)         | 5 (1.5%)            | 1 (2.1%)             | 1 (1.4%)        |
| Highest OASIS Score at 3h                              | 34 (26, 39)      | 34 (27, 40)         | 34 (22, 38)          | 30 (25, 36)     |
| Mechanical ventilation at time of NOAF                 | 243 (53%)        | 192 (56%)           | 22 (47%)             | 29 (42%)        |
| Renal replacement therapy during or <12h prior to NOAF | 65 (14%)         | 52 (15%)            | 5 (11%)              | 8 (12%)         |

|                                                           |                   |                   |                   |                   |
|-----------------------------------------------------------|-------------------|-------------------|-------------------|-------------------|
| IV Vasoactive medication at time of NOAF                  | 124 (27%)         | 105 (31%)         | 6 (13%)           | 13 (19%)          |
| Therapeutic anticoagulation at time of NOAF               | 48 (10%)          | 37 (11%)          | 5 (11%)           | 6 (8.7%)          |
| Central venous catheter at time of NOAF                   | 326 (71%)         | 262 (76%)         | 32 (68%)          | 32 (46%)          |
| Bronchodilator therapy on day of, or day preceeding, NOAF | 75 (16%)          | 57 (17%)          | 7 (15%)           | 11 (16%)          |
| Plasma sodium concentration (mmol/L)                      | 137 (134, 141)    | 137 (134, 141)    | 139 (136, 144)    | 138 (135, 140)    |
| Plasma potassium concentration (mmol/L)                   | 4.2 (3.9, 4.5)    | 4.2 (3.9, 4.5)    | 4.1 (4.0, 4.6)    | 4.2 (3.9, 4.4)    |
| Plasma magnesium concentration (mmol/L)                   | 0.96 (0.84, 1.12) | 0.95 (0.84, 1.14) | 1.01 (0.92, 1.16) | 0.92 (0.82, 1.08) |
| Plasma urea concentration (mmol/L)                        | 13.6 (8.8, 19.5)  | 13.8 (9.5, 20.1)  | 12.1 (7.8, 17.7)  | 13.2 (8.2, 18.5)  |
| Plasma creatinine concentration (micromol/L)              | 125 (78, 214)     | 134 (78, 224)     | 108 (70, 151)     | 112 (84, 185)     |
| White cell count (x10 <sup>9</sup> / L)                   | 11.1 (7.7, 16.3)  | 11.1 (7.5, 16.2)  | 10.6 (7.6, 13.4)  | 12.0 (9.5, 16.8)  |
| Haemoglobin concentration (g/L)                           | 98 (88, 113)      | 97 (87, 111)      | 103 (94, 112)     | 101 (90, 116)     |
| Platelet count (x10 <sup>9</sup> / L)                     | 166 (109, 234)    | 163 (105, 231)    | 192 (118, 247)    | 180 (136, 237)    |
| Prothrombin time (s)                                      | 16.1 (15.0, 19.0) | 16.2 (15.0, 19.0) | 15.5 (14.4, 17.0) | 16.6 (15.0, 19.4) |
| Systolic blood pressure after AF onset                    | 116 (99, 131)     | 112 (97, 128)     | 128 (108, 156)    | 119 (103, 135)    |
| Mean blood pressure after AF onset                        | 75 (67, 86)       | 74 (67, 85)       | 83 (73, 94)       | 78 (70, 88)       |
| Heart rate after AF onset                                 | 127 (107, 147)    | 128 (107, 149)    | 125 (110, 146)    | 120 (98, 140)     |

# Unadjusted time-to-event curves

## Rate control

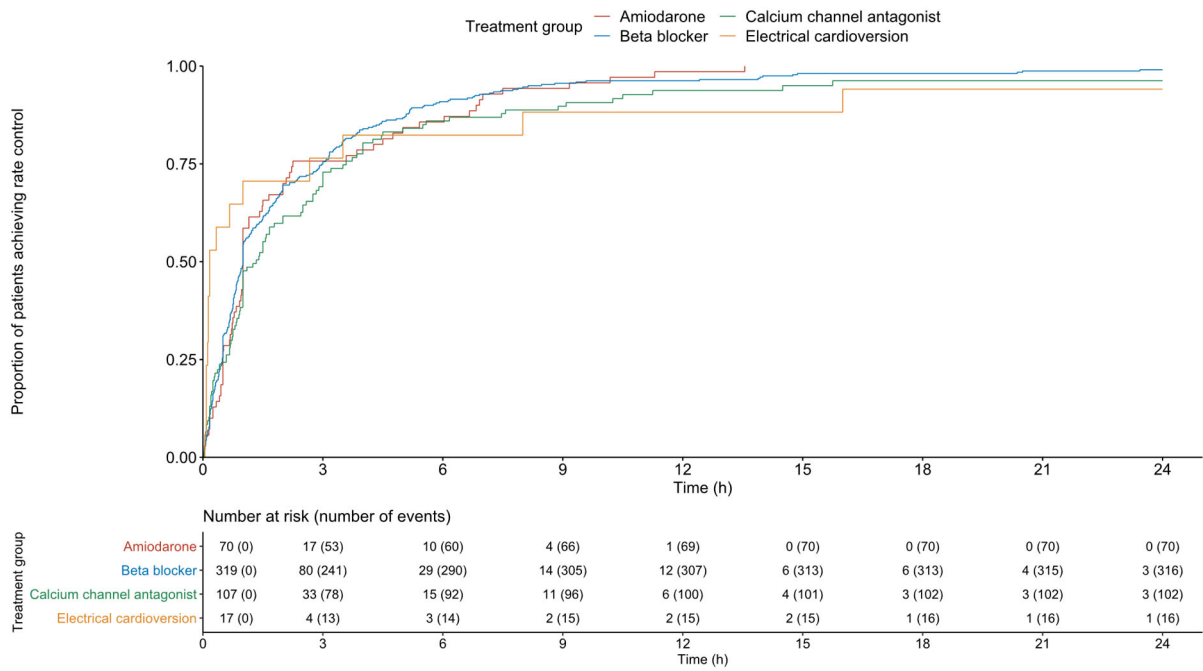

Supplemental Figure S5 - Cumulative incidence plot of time from treatment to heart rate <110 for each treatment: MIMIC database

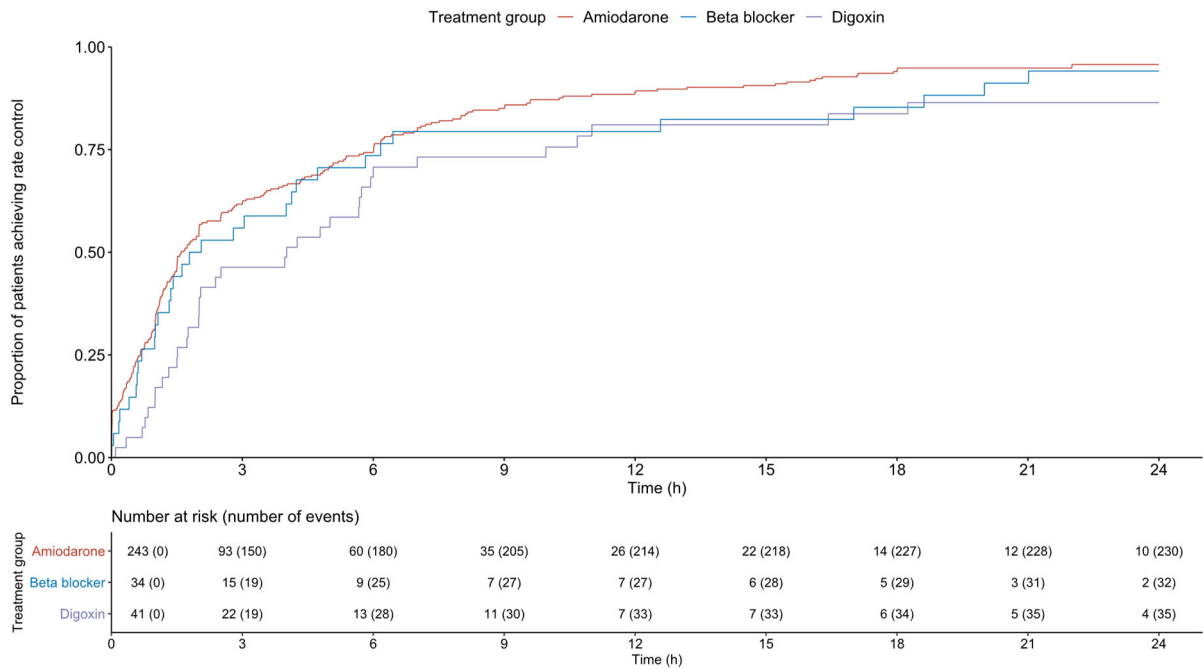

Supplemental Figure S6 - Cumulative incidence plot of time from treatment to heart rate <110 for each treatment: PICRAM database

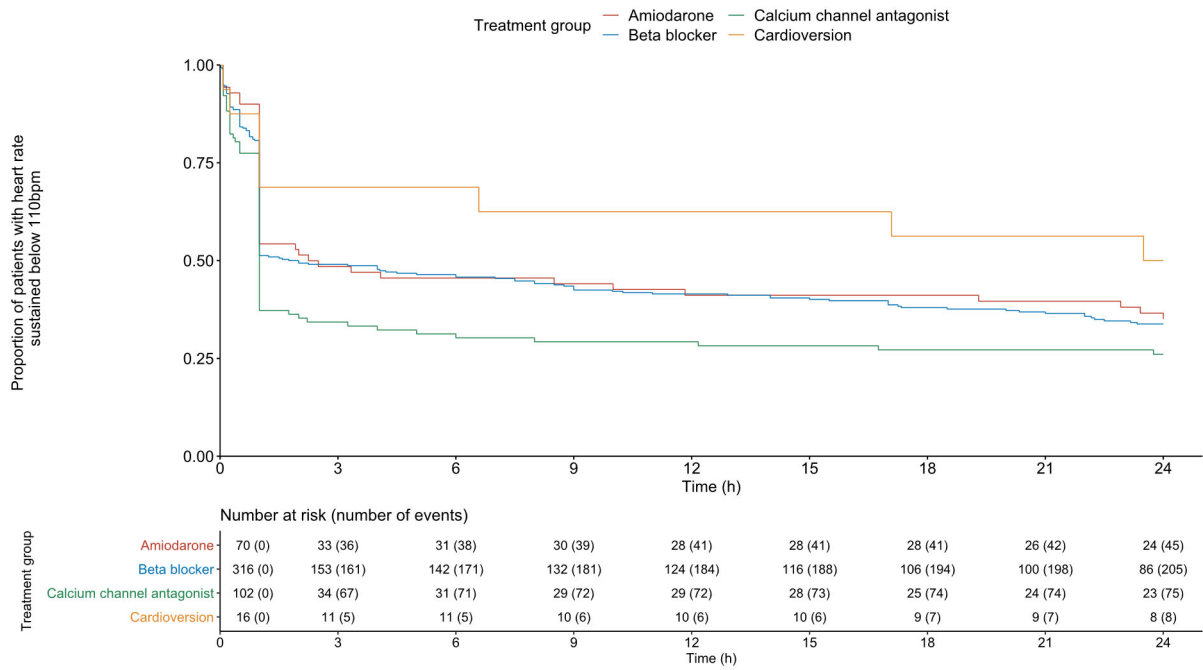

Supplemental Figure S7 - Kaplan-Meier curves of time from achieving rate control to reversion to heart rate  $\geq 110$ : MIMIC-III database

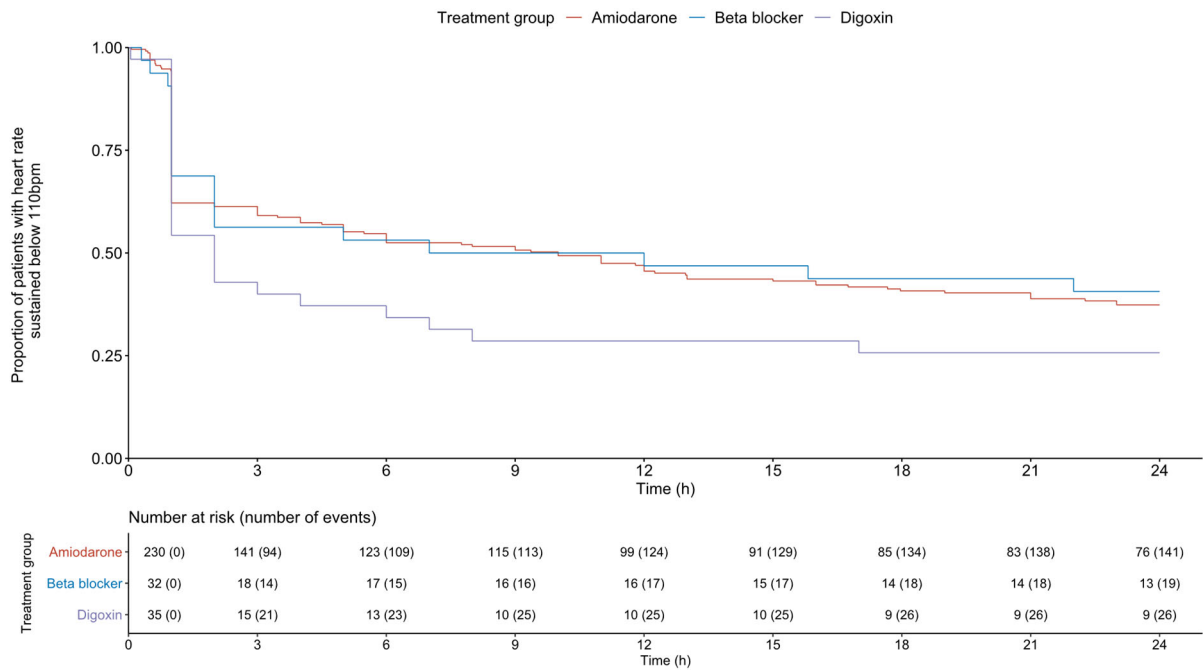

Supplemental Figure S8 - Kaplan-Meier curves of time from achieving rate control to reversion to heart rate  $\geq 110$ : PICRAM database

## Rhythm control

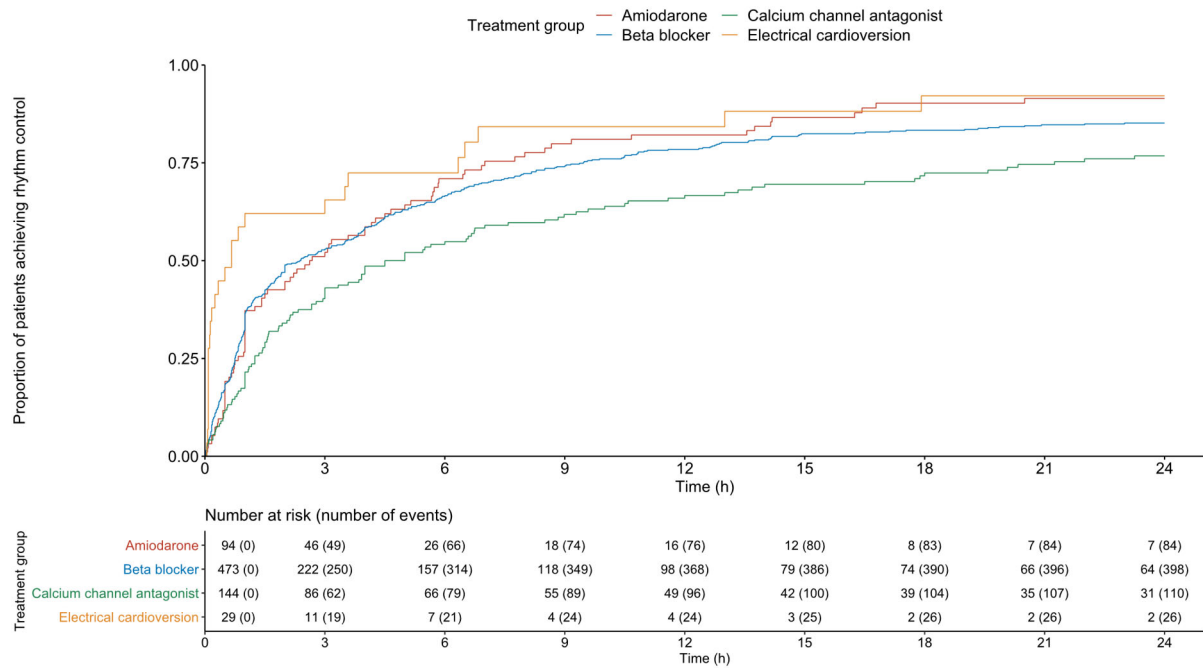

Supplemental Figure S9 - Cumulative incidence plot of time from treatment to rhythm control for each treatment: MIMIC database

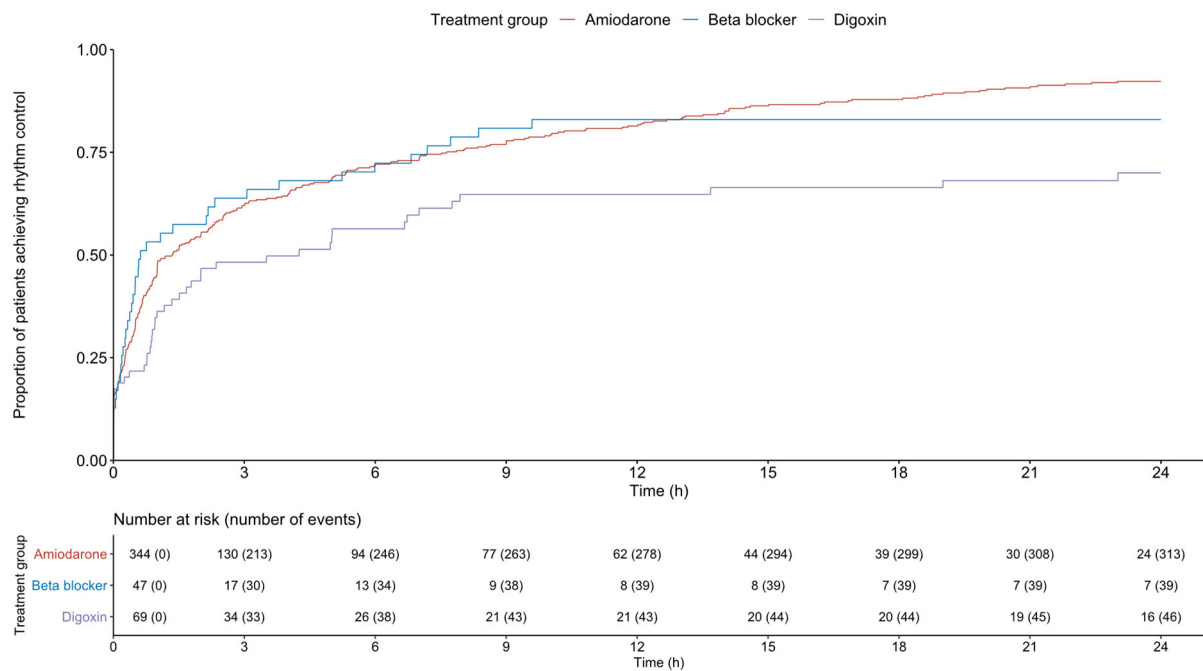

Supplemental Figure S10 - Cumulative incidence plot of time from treatment to rhythm control for each treatment: PICRAM database

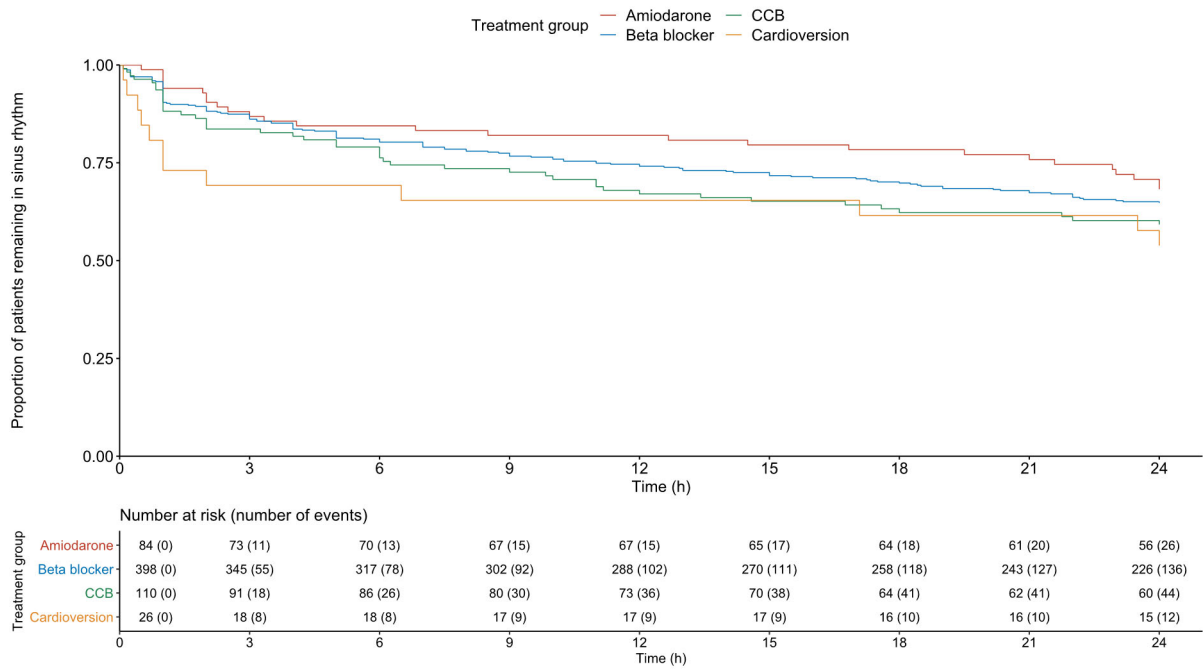

Supplemental Figure S11 - Kaplan-Meier curves for each treatment of time from achieving rhythm control to reversion to AF: MIMIC-III database

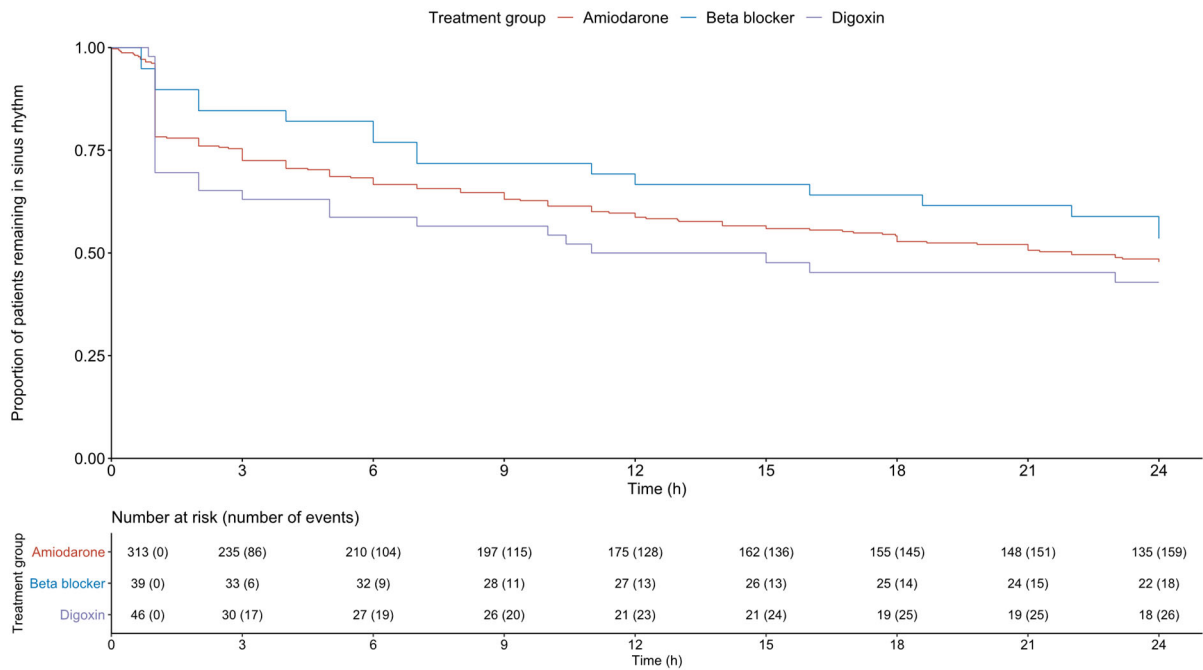

Supplemental Figure S12 - Kaplan-Meier curves for each treatment of time from achieving rhythm control to reversion to AF: PICRAM database

# Survival

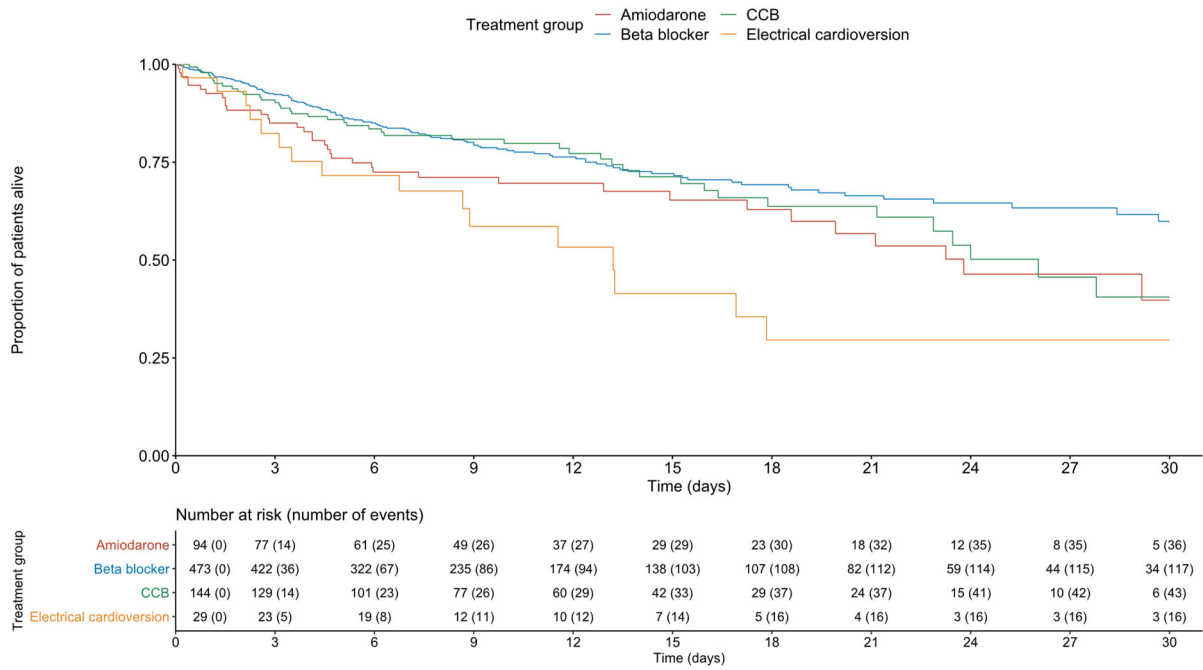

Supplemental Figure S13 - Kaplan-Meier survival curves for each treatment group: MIMIC-III database

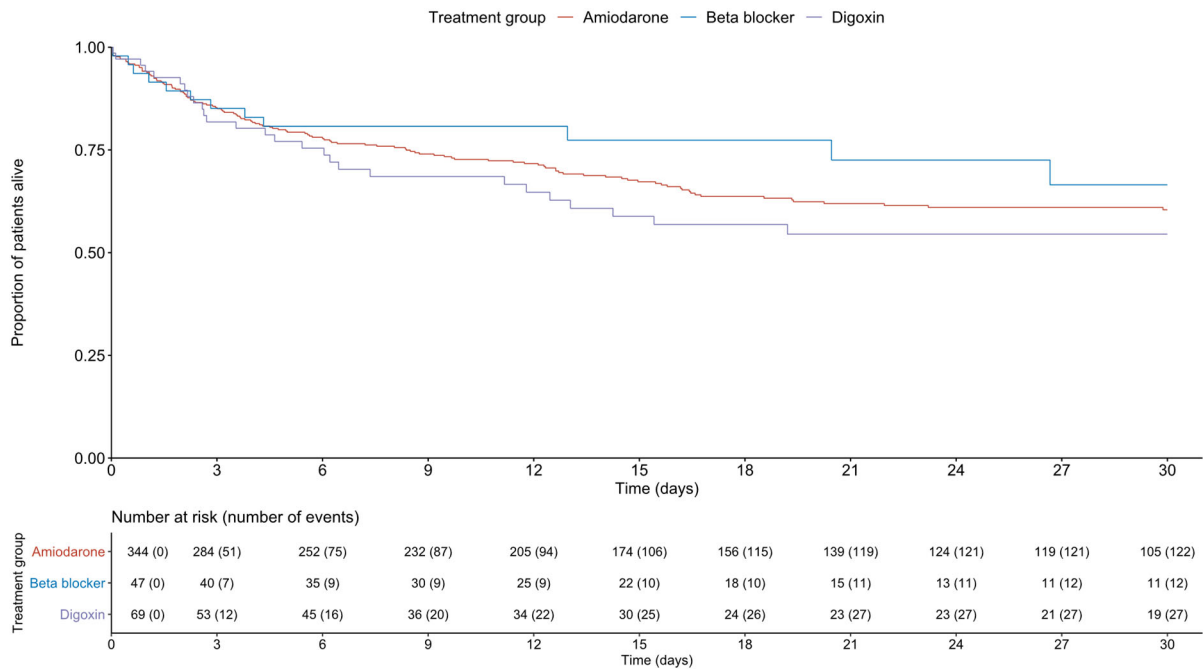

Supplemental Figure S14 - Kaplan-Meier survival curves for each treatment group: PICRAM database



## **Adjustment for confounding**

Supplemental Table S5 - Unweighted and weighted covariate means by treatment group: MIMIC-III database

| Variable                                | Unweighted means |              |                         |       | Weighted means |              |                         |       | Maximum pairwise standardised mean difference (Unweighted) | Maximum pairwise standardised mean difference (Weighted) |
|-----------------------------------------|------------------|--------------|-------------------------|-------|----------------|--------------|-------------------------|-------|------------------------------------------------------------|----------------------------------------------------------|
|                                         | Amiodarone       | Beta blocker | Calcium channel blocker | DCCV  | Amiodarone     | Beta blocker | Calcium channel blocker | DCCV  |                                                            |                                                          |
| Age                                     | 71.84            | 71.98        | 72.56                   | 74.14 | 72.90          | 72.56        | 72.74                   | 72.72 | 0.17                                                       | 0.03                                                     |
| Male sex                                | 0.46             | 0.51         | 0.47                    | 0.66  | 0.51           | 0.51         | 0.51                    | 0.54  | 0.20                                                       | 0.03                                                     |
| OASIS 3hr score                         | 36.80            | 35.21        | 35.22                   | 38.93 | 35.87          | 35.89        | 35.94                   | 36.71 | 0.48                                                       | 0.11                                                     |
| Beta blocker on admission               | 0.40             | 0.45         | 0.31                    | 0.52  | 0.44           | 0.44         | 0.41                    | 0.49  | 0.21                                                       | 0.08                                                     |
| Antipsychotic medication on admission   | 0.05             | 0.06         | 0.03                    | 0.00  | 0.04           | 0.04         | 0.04                    | 0.00  | 0.06                                                       | 0.04                                                     |
| Thyroid disorder                        | 0.02             | 0.06         | 0.02                    | 0.03  | 0.04           | 0.04         | 0.04                    | 0.05  | 0.04                                                       | 0.01                                                     |
| COPD                                    | 0.03             | 0.06         | 0.13                    | 0.10  | 0.06           | 0.08         | 0.08                    | 0.11  | 0.10                                                       | 0.05                                                     |
| Liver disease                           | 0.02             | 0.01         | 0.01                    | 0.00  | 0.01           | 0.01         | 0.01                    | 0.00  | 0.02                                                       | 0.01                                                     |
| Dialysis-dependent Renal failure        | 0.00             | 0.00         | 0.00                    | 0.00  | 0.00           | 0.00         | 0.00                    | 0.00  | 0.00                                                       | 0.00                                                     |
| Plasma sodium concentration (mmol/L)    | 138              | 140          | 140                     | 139   | 139            | 140          | 140                     | 140   | 0.35                                                       | 0.03                                                     |
| Plasma potassium concentration (mmol/L) | 4.10             | 4.02         | 4.02                    | 4.03  | 4.01           | 4.02         | 4.01                    | 3.97  | 0.15                                                       | 0.08                                                     |
| Plasma magnesium concentration (mmol/L) | 0.86             | 0.86         | 0.87                    | 0.84  | 0.85           | 0.85         | 0.85                    | 0.83  | 0.20                                                       | 0.17                                                     |

|                                             |       |       |       |       |       |       |       |       |      |      |
|---------------------------------------------|-------|-------|-------|-------|-------|-------|-------|-------|------|------|
| Plasma creatinine concentration (mmol/L)    | 164.2 | 148.1 | 125.4 | 219.5 | 157.1 | 152.4 | 149.9 | 163.6 | 0.57 | 0.08 |
| Plasma urea concentration (micromol/L)      | 12.0  | 12.00 | 12.1  | 18.5  | 12.3  | 13.0  | 13.3  | 15.1  | 0.69 | 0.30 |
| White cell count                            | 14.9  | 12.7  | 12.6  | 15.3  | 13.5  | 13.3  | 12.9  | 13.8  | 0.32 | 0.11 |
| Haemoglobin concentration (g/L)             | 103   | 104   | 105   | 100   | 103   | 103   | 103   | 101   | 0.30 | 0.13 |
| Platelet count (x10 <sup>9</sup> / L)       | 207   | 215   | 221   | 184   | 206   | 209   | 209   | 200   | 0.29 | 0.07 |
| Therapeutic anticoagulation at time of NOAF | 0.06  | 0.05  | 0.03  | 0.07  | 0.05  | 0.04  | 0.04  | 0.04  | 0.03 | 0.01 |
| Prothrombin time                            | 15.8  | 14.9  | 14.9  | 15.5  | 15.2  | 15.2  | 15.2  | 15.5  | 0.24 | 0.10 |
| Systolic blood pressure after AF onset      | 106   | 119   | 117   | 90    | 113   | 114   | 114   | 109   | 0.83 | 0.15 |
| Mean blood pressure after AF onset          | 67    | 75    | 74    | 58    | 71    | 71    | 72    | 68    | 0.76 | 0.20 |
| Heart rate after AF onset                   | 124   | 121   | 124   | 122   | 123   | 123   | 123   | 125   | 0.11 | 0.09 |
| Temp ( °C)                                  | 37.0  | 37.0  | 37.0  | 36.9  | 37.0  | 37.0  | 37.1  | 37.0  | 0.23 | 0.05 |
| IV Vasoactive medication at time of NOAF    | 0.36  | 0.10  | 0.06  | 0.45  | 0.17  | 0.16  | 0.15  | 0.21  | 0.39 | 0.06 |
| Noradrenaline dose (mcg/Kg/min)             | 0.12  | 0.02  | 0.01  | 0.08  | 0.03  | 0.03  | 0.02  | 0.04  | 0.66 | 0.09 |
| Vasopressin dose (mcg/Kg/min)               | 0.17  | 0.05  | 0.02  | 0.29  | 0.07  | 0.07  | 0.05  | 0.10  | 0.48 | 0.08 |
| Bronchodilator therapy on day of,           | 0.35  | 0.33  | 0.43  | 0.28  | 0.33  | 0.33  | 0.35  | 0.30  | 0.15 | 0.04 |

|                                                        |      |      |      |      |      |      |      |      |      |      |
|--------------------------------------------------------|------|------|------|------|------|------|------|------|------|------|
| or day preceding,<br>NOAF                              |      |      |      |      |      |      |      |      |      |      |
| Mechanical ventilation at time of NOAF                 | 0.64 | 0.44 | 0.38 | 0.76 | 0.51 | 0.50 | 0.47 | 0.58 | 0.38 | 0.11 |
| Central venous catheter at time of NOAF                | 0.73 | 0.55 | 0.52 | 0.83 | 0.63 | 0.61 | 0.61 | 0.68 | 0.31 | 0.08 |
| Renal replacement therapy during or <12h prior to NOAF | 0.05 | 0.08 | 0.01 | 0.10 | 0.04 | 0.05 | 0.02 | 0.04 | 0.10 | 0.03 |

Supplemental Table S6 - Unweighted and weighted covariate means by treatment group: PICRAM database

| Variable                              | Unweighted means |              |         | Weighted means |              |         | Maximum pairwise standardised mean difference (Unweighted) | Maximum pairwise standardised mean difference (Weighted) |
|---------------------------------------|------------------|--------------|---------|----------------|--------------|---------|------------------------------------------------------------|----------------------------------------------------------|
|                                       | Amiodarone       | Beta blocker | Digoxin | Amiodarone     | Beta blocker | Digoxin |                                                            |                                                          |
| Age                                   | 68.60            | 68.94        | 71.78   | 69.52          | 69.23        | 70.24   | 0.28                                                       | 0.09                                                     |
| Male sex                              | 0.59             | 0.57         | 0.64    | 0.60           | 0.59         | 0.62    | 0.06                                                       | 0.02                                                     |
| OASIS 3hr score                       | 33.77            | 31.17        | 29.83   | 32.75          | 32.62        | 31.91   | 0.43                                                       | 0.09                                                     |
| Beta blocker on admission             | 0.13             | 0.21         | 0.13    | 0.14           | 0.16         | 0.15    | 0.08                                                       | 0.02                                                     |
| Antipsychotic medication on admission | 0.01             | 0.02         | 0.01    | 0.02           | 0.02         | 0.01    | 0.01                                                       | 0.01                                                     |
| Thyroid disorder                      | 0.06             | 0.06         | 0.06    | 0.06           | 0.06         | 0.07    | 0.01                                                       | 0.00                                                     |
| COPD                                  | 0.15             | 0.02         | 0.16    | 0.12           | 0.05         | 0.13    | 0.14                                                       | 0.07                                                     |
| Liver disease                         | 0.04             | 0.02         | 0.07    | 0.04           | 0.03         | 0.05    | 0.05                                                       | 0.02                                                     |
| NYHA class III/IV heart failure       | 0.01             | NA           | 0.00    | 0.00           | NA           | 0.00    | 0.01                                                       | 0.00                                                     |

|                                             |      |      |      |      |      |      |      |      |
|---------------------------------------------|------|------|------|------|------|------|------|------|
| Dialysis-dependent renal failure            | 0.02 | 0.00 | 0.01 | 0.01 | 0.00 | 0.01 | 0.02 | 0.01 |
| Plasma sodium concentration (mmol/L)        | 138  | 140  | 138  | 138  | 139  | 138  | 0.40 | 0.14 |
| Plasma potassium concentration (mmol/L)     | 4.24 | 4.30 | 4.20 | 4.24 | 4.26 | 4.24 | 0.19 | 0.05 |
| Plasma magnesium concentration (mmol/L)     | 0.99 | 1.02 | 0.96 | 0.99 | 1.00 | 0.99 | 0.29 | 0.08 |
| Plasma creatinine concentration (mmol/L)    | 171  | 142  | 156  | 165  | 165  | 165  | 0.25 | 0.00 |
| Plasma urea concentration (micromol/L)      | 16.0 | 13.7 | 13.9 | 15.0 | 14.6 | 14.3 | 0.27 | 0.09 |
| White cell count                            | 12.6 | 11.2 | 12.9 | 12.5 | 11.9 | 12.5 | 0.25 | 0.09 |
| Haemoglobin concentration (g/L)             | 101  | 104  | 105  | 102  | 102  | 102  | 0.27 | 0.03 |
| Platelet count (x10 <sup>9</sup> / L)       | 180  | 198  | 208  | 190  | 197  | 197  | 0.25 | 0.06 |
| Therapeutic anticoagulation at time of NOAF | 0.11 | 0.11 | 0.09 | 0.11 | 0.13 | 0.11 | 0.02 | 0.02 |
| Prothrombin time                            | 17.5 | 16.4 | 18.5 | 17.5 | 16.8 | 17.8 | 0.41 | 0.18 |
| Systolic blood pressure after AF onset      | 115  | 131  | 121  | 118  | 122  | 118  | 0.64 | 0.13 |
| Mean blood pressure after AF onset          | 77   | 85   | 81   | 79   | 79   | 79   | 0.48 | 0.04 |
| Heart rate after AF onset                   | 129  | 127  | 120  | 127  | 126  | 127  | 0.31 | 0.03 |
| Temp (°C)                                   | 36.6 | 36.8 | 36.5 | 36.6 | 36.8 | 36.8 | 0.34 | 0.17 |
| IV Vasoactive medication at time of NOAF    | 0.31 | 0.13 | 0.19 | 0.26 | 0.22 | 0.24 | 0.18 | 0.04 |
| Noradrenaline dose (mcg/Kg/min)             | 0.06 | 0.04 | 0.04 | 0.06 | 0.05 | 0.06 | 0.23 | 0.05 |
| Vasopressin dose (mcg/Kg/min)               | 0.05 | NA   | 0.00 | 0.02 | NA   | 0.00 | 0.29 | 0.12 |

|                                                          |      |      |      |      |      |      |      |      |
|----------------------------------------------------------|------|------|------|------|------|------|------|------|
| Bronchodilator therapy on day of, or day preceding, NOAF | 0.17 | 0.15 | 0.16 | 0.17 | 0.18 | 0.16 | 0.02 | 0.02 |
| Mechanical ventilation at time of NOAF                   | 0.56 | 0.47 | 0.42 | 0.52 | 0.53 | 0.49 | 0.14 | 0.04 |
| Central venous catheter at time of NOAF                  | 0.76 | 0.68 | 0.46 | 0.69 | 0.71 | 0.64 | 0.30 | 0.07 |
| Renal replacement therapy during or <12h prior to NOAF   | 0.15 | 0.11 | 0.12 | 0.14 | 0.14 | 0.13 | 0.04 | 0.01 |

Supplemental Table S7 - Unweighted and weighted covariate means by treatment group: Combined databases

| Variable                                    | Unweighted means |               | Weighted means |               | Pairwise standardised mean difference (Unweighted) | Pairwise standardised mean difference (Weighted) |
|---------------------------------------------|------------------|---------------|----------------|---------------|----------------------------------------------------|--------------------------------------------------|
|                                             | Amiodarone       | Beta blockers | Amiodarone     | Beta blockers |                                                    |                                                  |
| Age                                         | 69.30            | 71.70         | 70.65          | 70.54         | 0.20                                               | -0.01                                            |
| Male sex                                    | 0.56             | 0.51          | 0.54           | 0.53          | -0.05                                              | 0.00                                             |
| OASIS 3hr score                             | 34.42            | 34.84         | 34.65          | 34.66         | 0.05                                               | 0.00                                             |
| Beta blocker on admission                   | 0.19             | 0.44          | 0.32           | 0.34          | 0.25                                               | 0.02                                             |
| Antipsychotic medication on admission       | 0.02             | 0.04          | 0.03           | 0.03          | 0.02                                               | 0.00                                             |
| Thyroid disorder                            | 0.05             | 0.06          | 0.05           | 0.06          | 0.01                                               | 0.00                                             |
| COPD                                        | 0.12             | 0.06          | 0.09           | 0.08          | -0.07                                              | 0.00                                             |
| Liver disease                               | 0.04             | 0.02          | 0.02           | 0.02          | -0.02                                              | 0.00                                             |
| NYHA class III/IV heart failure             | 0.00             | 0.00          | 0.00           | 0.00          | 0.00                                               | 0.00                                             |
| Dialysis-dependent renal failure            | 0.01             | 0.00          | 0.01           | 0.01          | -0.01                                              | 0.00                                             |
| Plasma sodium concentration (mmol/L)        | 138              | 140           | 139            | 139           | 0.35                                               | 0.01                                             |
| Plasma potassium concentration (mmol/L)     | 4.21             | 4.05          | 4.12           | 4.12          | -0.29                                              | -0.01                                            |
| Plasma magnesium concentration (mmol/L)     | 0.96             | 0.87          | 0.92           | 0.91          | -0.43                                              | -0.02                                            |
| Plasma creatinine concentration (mmol/L)    | 174              | 147           | 157            | 159           | -0.17                                              | 0.01                                             |
| Plasma urea concentration (micromol/L)      | 15.3             | 12.1          | 13.7           | 13.5          | -0.32                                              | -0.02                                            |
| White cell count                            | 13.2             | 12.5          | 12.8           | 13.0          | -0.09                                              | 0.01                                             |
| Haemoglobin concentration (g/L)             | 101              | 104           | 103            | 103           | 0.17                                               | 0.01                                             |
| Platelet count (x10 <sup>9</sup> / L)       | 186              | 213           | 200            | 201           | 0.22                                               | 0.01                                             |
| Therapeutic anticoagulation at time of NOAF | 0.10             | 0.05          | 0.08           | 0.07          | -0.04                                              | 0.00                                             |

|                                                          |       |       |       |       |       |       |
|----------------------------------------------------------|-------|-------|-------|-------|-------|-------|
| Prothrombin time                                         | 16.9  | 15.0  | 16.0  | 16.0  | -0.45 | -0.01 |
| Systolic blood pressure after AF onset                   | 113   | 124   | 119   | 119   | 0.39  | 0.01  |
| Mean blood pressure after AF onset                       | 76    | 82.   | 79    | 79    | 0.33  | 0.03  |
| Heart rate after AF onset                                | 128   | 120   | 123   | 123   | -0.29 | 0.00  |
| Temp (°C)                                                | 36.68 | 37.00 | 36.86 | 36.87 | 0.37  | 0.02  |
| IV Vasoactive medication at time of NOAF                 | 0.32  | 0.10  | 0.20  | 0.19  | -0.22 | -0.01 |
| Noradrenaline dose (mcg/Kg/min)                          | 0.08  | 0.02  | 0.04  | 0.04  | -0.43 | -0.02 |
| Vasopressin dose (mcg/Kg/min)                            | 0.07  | 0.04  | 0.06  | 0.07  | -0.09 | 0.02  |
| Bronchodilator therapy on day of, or day preceding, NOAF | 0.21  | 0.31  | 0.26  | 0.27  | 0.11  | 0.00  |
| Mechanical ventilation at time of NOAF                   | 0.58  | 0.44  | 0.50  | 0.50  | -0.14 | 0.00  |
| Central venous catheter at time of NOAF                  | 0.76  | 0.56  | 0.65  | 0.66  | -0.19 | 0.00  |
| Renal replacement therapy during or <12h prior to NOAF   | 0.13  | 0.08  | 0.10  | 0.11  | -0.05 | 0.00  |



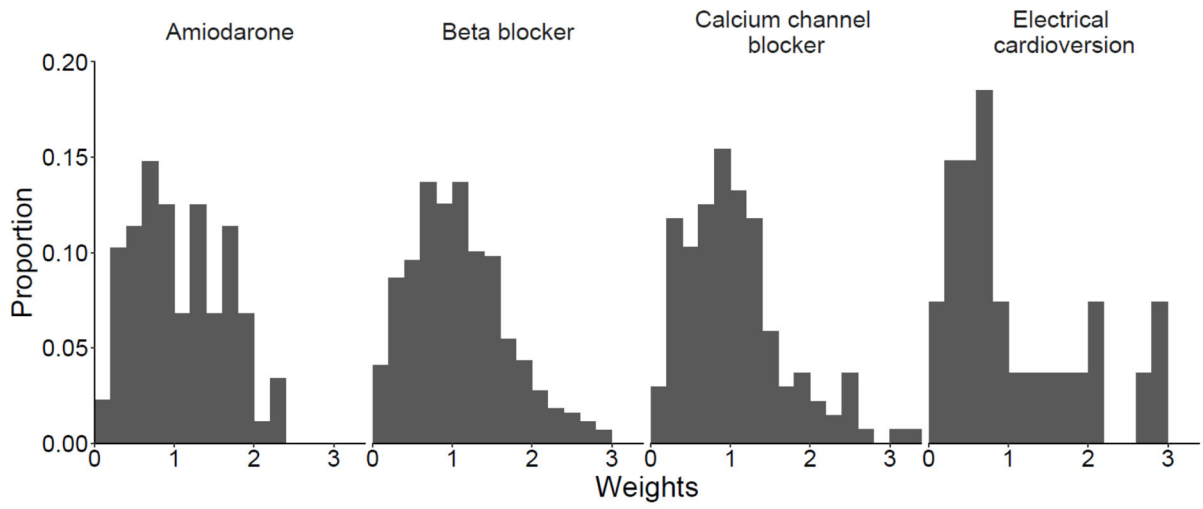

Supplemental Figure S15 - Histograms of propensity weights by treatment group: MIMIC-III database

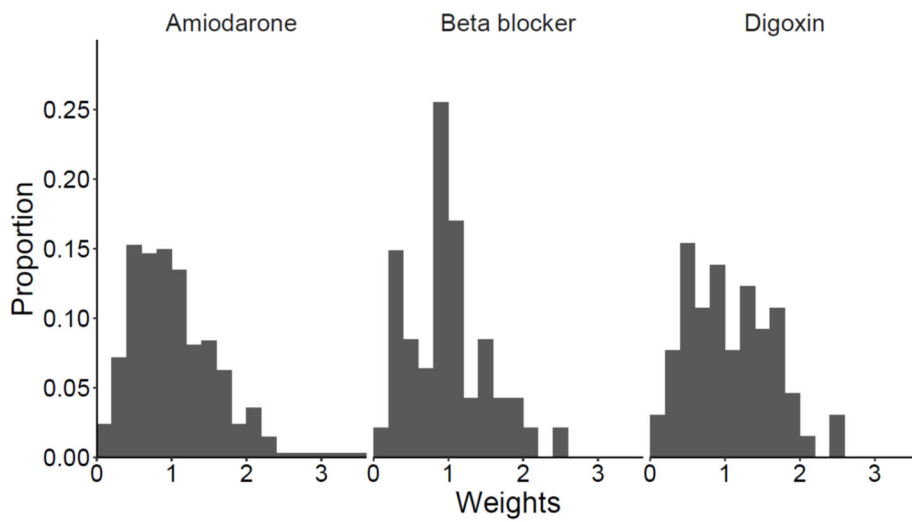

Supplemental Figure S16 - Histograms of propensity weights by treatment group: PICRAM database

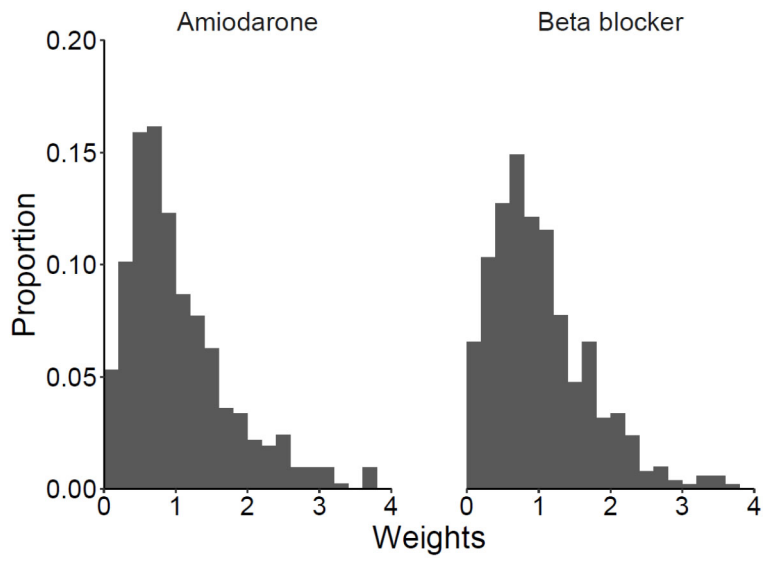

Supplemental Figure S17 - Histograms of propensity weights by treatment group: Combined dataset

## Outcomes

Supplemental Table S8 - Unadjusted and adjusted hazard ratios for each outcome (compared with amiodarone) and associated 95% confidence intervals: MIMIC-III database

| Outcome                            | Treatment group         | Unadjusted   |             |              | Adjusted     |             |              |
|------------------------------------|-------------------------|--------------|-------------|--------------|--------------|-------------|--------------|
|                                    |                         | Hazard ratio | %95CI Lower | 95% CI Upper | Hazard ratio | %95CI Lower | 95% CI Upper |
| Rate control                       | Beta blocker            | 1.03         | 0.81        | 1.30         | 1.09         | 0.78        | 1.51         |
|                                    | Calcium channel blocker | 0.83         | 0.62        | 1.12         | 0.81         | 0.55        | 1.19         |
|                                    | Cardioversion           | 1.01         | 0.39        | 2.62         | 1.59         | 0.44        | 5.75         |
| Rhythm control                     | Beta blocker            | 0.91         | 0.73        | 1.12         | 0.91         | 0.61        | 1.35         |
|                                    | Calcium channel blocker | 0.65         | 0.50        | 0.84         | 0.59         | 0.37        | 0.92         |
|                                    | Cardioversion           | 1.45         | 0.82        | 2.57         | 2.00         | 0.86        | 4.65         |
| Reversion to AF                    | Beta blocker            | 1.18         | 0.79        | 1.78         | 1.37         | 0.67        | 2.78         |
|                                    | Calcium channel blocker | 1.44         | 0.90        | 2.31         | 1.73         | 0.78        | 3.84         |
|                                    | Cardioversion           | 1.80         | 0.83        | 3.90         | 1.01         | 0.28        | 3.71         |
| Reversion to heart rate $\geq 110$ | Beta blocker            | 1.08         | 0.80        | 1.46         | 0.95         | 0.59        | 1.52         |
|                                    | Calcium channel blocker | 1.44         | 1.00        | 2.07         | 1.61         | 0.93        | 2.79         |
|                                    | Cardioversion           | 0.67         | 0.30        | 1.53         | 0.93         | 0.36        | 2.42         |
| Hospital mortality                 | Beta blocker            | 0.64         | 0.44        | 0.93         | 1.03         | 0.53        | 2.03         |
|                                    | Calcium channel blocker | 0.77         | 0.50        | 1.20         | 1.30         | 0.61        | 2.76         |
|                                    | Cardioversion           | 1.56         | 0.86        | 2.83         | 0.96         | 0.31        | 3.01         |

Supplemental Table S9 - Unadjusted and adjusted hazard ratios (compared with amiodarone) for each outcome and associated 95% confidence intervals: PICRAM database

| Outcome                    | Treatment group | Unadjusted results |             |              | Adjusted results |             |              |
|----------------------------|-----------------|--------------------|-------------|--------------|------------------|-------------|--------------|
|                            |                 | Hazard ratio       | %95CI Lower | 95% CI Upper | Hazard ratio     | %95CI Lower | 95% CI Upper |
| Rate control               | Beta blocker    | 0.85               | 0.57        | 1.27         | 0.82             | 0.48        | 1.42         |
|                            | Digoxin         | 0.64               | 0.45        | 0.92         | 0.56             | 0.34        | 0.92         |
| Rhythm control             | Beta blocker    | 0.95               | 0.64        | 1.40         | 0.99             | 0.57        | 1.72         |
|                            | Digoxin         | 0.57               | 0.41        | 0.81         | 0.67             | 0.41        | 1.09         |
| Reversion to AF            | Beta blocker    | 0.79               | 0.50        | 1.27         | 0.84             | 0.42        | 1.65         |
|                            | Digoxin         | 1.21               | 0.78        | 1.89         | 1.32             | 0.71        | 2.47         |
| Reversion to HR $\geq 110$ | Beta blocker    | 0.94               | 0.58        | 1.52         | 0.88             | 0.43        | 1.79         |
|                            | Digoxin         | 1.41               | 0.91        | 2.19         | 1.14             | 0.63        | 2.09         |
| Hospital mortality         | Beta blocker    | 0.74               | 0.40        | 1.38         | 0.75             | 0.30        | 1.86         |
|                            | Digoxin         | 1.21               | 0.79        | 1.86         | 1.40             | 0.77        | 2.56         |

Supplemental Table S10 - Unadjusted and adjusted hazard ratios for each outcome (compared with amiodarone) and associated 95% confidence intervals: Combined databases

| Outcome                                             | Treatment group | Unadjusted results |             |              | Adjusted results |             |              |
|-----------------------------------------------------|-----------------|--------------------|-------------|--------------|------------------|-------------|--------------|
|                                                     |                 | Hazard ratio       | %95CI Lower | 95% CI Upper | Hazard ratio     | %95CI Lower | 95% CI Upper |
| <b>Rate control</b>                                 | Beta blocker    | 1.32               | 1.12        | 1.55         | 1.15             | 0.91        | 1.46         |
| <b>Rhythm control</b>                               | Beta blocker    | 0.81               | 0.71        | 0.93         | 0.85             | 0.69        | 1.05         |
| <b>Reversion to AF</b>                              | Beta blocker    | 0.68               | 0.55        | 0.85         | 0.75             | 0.54        | 1.03         |
| <b>Reversion to heart rate <math>\geq</math>110</b> | Beta blocker    | 1.16               | 0.95        | 1.42         | 1.02             | 0.76        | 1.37         |
| <b>Hospital mortality</b>                           | Beta blocker    | 0.77               | 0.61        | 0.98         | 1.06             | 0.73        | 1.52         |

## Missingness of variables

Supplemental Table S11 - Missingness of weighting variables: MIMIC-III database

| Variable                                 | Number missing | Percentage missing |
|------------------------------------------|----------------|--------------------|
| Prothrombin time                         | 194            | 26.22              |
| Beta blocker on admission                | 72             | 9.73               |
| Antipsychotic medication on admission    | 72             | 9.73               |
| Plasma magnesium concentration (mmol/L)  | 26             | 3.51               |
| White cell count                         | 11             | 1.49               |
| Platelet count ( $\times 10^9$ / L)      | 11             | 1.49               |
| Haemoglobin concentration (g/L)          | 10             | 1.35               |
| Plasma creatinine concentration (mmol/L) | 9              | 1.22               |
| Plasma urea concentration (micromol/L)   | 9              | 1.22               |
| Plasma sodium concentration (mmol/L)     | 6              | 0.81               |
| Plasma potassium concentration (mmol/L)  | 4              | 0.54               |

Supplemental Table S12 - Missingness of matching variables: PICRAM database

| Variable                                 | Number missing | Percentage missing |
|------------------------------------------|----------------|--------------------|
| Prothrombin time                         | 49             | 10.65              |
| White cell count                         | 44             | 9.57               |
| Plasma creatinine concentration (mmol/L) | 41             | 8.91               |
| Platelet count ( $\times 10^9$ / L)      | 39             | 8.48               |
| Plasma magnesium concentration (mmol/L)  | 35             | 7.61               |
| Plasma urea concentration (micromol/L)   | 35             | 7.61               |
| Haemoglobin concentration (g/L)          | 3              | 0.65               |
| Plasma sodium concentration (mmol/L)     | 2              | 0.43               |
| potassium                                | 2              | 0.43               |
| Mean blood pressure after AF onset       | 1              | 0.22               |
| Systolic blood pressure after AF onset   | 1              | 0.22               |
