# Supplementary material for: Comparative effectiveness of common treatments for new-onset atrial fibrillation within the ICU: Accounting for physiological status
Source: PubMed Central journal article supplement (PMC8687206; doi:10.1016/j.jcrc.2021.11.005), 2022-02
Supplement: mmc3.pdf [file mmc3.pdf]

## Additional File 3

### Sensitivity analyses

#### 1 AMIODARONE VS BETA BLOCKERS

Supplemental Table S1 - Unweighted and weighted covariate means by treatment group: MIMIC-III database

|                                           | Amiodarone unweighted | Beta blocker unweighted | Amiodarone weighted | Beta blocker weighted | Standardised mean difference (Unweighted) | Standardised mean difference (weighted) |
|-------------------------------------------|-----------------------|-------------------------|---------------------|-----------------------|-------------------------------------------|-----------------------------------------|
| Age                                       | 71.8                  | 72.0                    | 72.4                | 72.0                  | 0.010                                     | -0.022                                  |
| Male sex                                  | 0.46                  | 0.51                    | 0.50                | 0.50                  | 0.048                                     | 0.002                                   |
| OASIS 3hr score                           | 36.8                  | 35.2                    | 35.6                | 35.5                  | -0.204                                    | -0.009                                  |
| Beta blocker on admission                 | 0.47                  | 0.44                    | 0.46                | 0.45                  | -0.022                                    | -0.008                                  |
| Antipsychotic medication on admission (%) | 5                     | 5                       | 5                   | 5                     | -0.005                                    | -0.001                                  |
| Thyroid disorder (%)                      | 2                     | 6                       | 4                   | 5                     | 0.036                                     | 0.011                                   |
| COPD (%)                                  | 3                     | 6                       | 4                   | 5                     | 0.027                                     | 0.010                                   |
| Liver disease (%)                         | 2                     | 2                       | 1                   | 2                     | -0.006                                    | 0.002                                   |
| Dialysis-dependent Renal failure (%)      | 0                     | 0.2                     | 0                   | 0.2                   | 0.002                                     | 0.002                                   |
| Plasma sodium concentration (mmol/L)      | 138                   | 140                     | 139                 | 139                   | 0.270                                     | 0.034                                   |
| Plasma potassium concentration (mmol/L)   | 4.10                  | 4.02                    | 4.0                 | 4.0                   | -0.131                                    | 0.005                                   |
| Plasma magnesium concentration (mmol/L)   | 0.85                  | 0.86                    | 0.86                | 0.86                  | 0.032                                     | -0.002                                  |

|                                                            |       |       |       |       |        |        |
|------------------------------------------------------------|-------|-------|-------|-------|--------|--------|
| Plasma creatinine concentration (mmol/L)                   | 165   | 147   | 153   | 151   | -0.104 | -0.016 |
| Plasma urea concentration (micromol/L)                     | 12.0  | 11.9  | 11.6  | 11.9  | -0.011 | 0.039  |
| White cell count                                           | 14.9  | 12.7  | 13.4  | 13.2  | -0.279 | -0.023 |
| Haemoglobin concentration (g/L)                            | 103   | 104   | 104   | 104   | 0.053  | 0.004  |
| Platelet count (x10 <sup>9</sup> / L)                      | 207   | 214   | 210   | 212   | 0.052  | 0.012  |
| Therapeutic anticoagulation at time of NOAF (%)            | 6     | 5     | 6     | 5     | -0.015 | -0.005 |
| Prothrombin time (s)                                       | 15.9  | 15.1  | 15.1  | 15.2  | -0.200 | 0.019  |
| Systolic blood pressure after AF onset                     | 106   | 119   | 116   | 117   | 0.388  | 0.021  |
| Mean blood pressure after AF onset                         | 67    | 75    | 73    | 73    | 0.350  | 0.016  |
| Heart rate after AF onset                                  | 124   | 121   | 122   | 121   | -0.118 | -0.026 |
| Temp ( °C)                                                 | 37.0  | 37.0  | 37.0  | 37.0  | -0.028 | -0.004 |
| IV Vasoactive medication at time of NOAF                   | 0.36  | 0.1   | 0.158 | 0.143 | -0.267 | -0.015 |
| Noradrenaline dose (mcg/Kg/min)                            | 0.115 | 0.016 | 0.036 | 0.028 | -0.493 | -0.042 |
| Vasopressin dose (mcg/Kg/min)                              | 0.167 | 0.048 | 0.068 | 0.070 | -0.244 | 0.005  |
| Bronchodilator therapy on day of, or day preceding, NOAF   | 35.1  | 32.8  | 33.4  | 32.8  | -0.023 | -0.006 |
| Mechanical ventilation at time of NOAF (%)                 | 64    | 44    | 49    | 47    | -0.203 | -0.020 |
| Central venous catheter at time of NOAF (%)                | 73    | 55    | 60    | 59    | -0.182 | -0.014 |
| Renal replacement therapy during or <12h prior to NOAF (%) | 5     | 8     | 5     | 7     | 0.027  | 0.020  |

*Supplemental Table S2 - Adjusted hazard ratios for beta blockers (versus amiodarone)*

| <b>Outcome</b>     | <b>Hazard ratio</b> |
|--------------------|---------------------|
| Hospital mortality | 1.09 [0.63 - 1.89]  |
| Rate control       | 1.04 [0.75 - 1.46]  |
| Rhythm control     | 0.90 [0.66 - 1.23]  |
| AF reversion       | 1.55 [0.86 - 2.81]  |
| Rate reversion     | 1.10 [0.7 - 1.72]   |

## 2 AMIODARONE VS CALCIUM CHANNEL BLOCKERS

Supplemental Table S3 - Unweighted and weighted covariate means by treatment group: MIMIC-III database

|                                             | <b>Amiodarone<br/>unweighted</b> | <b>CCB<br/>unweighted</b> | <b>Amiodarone<br/>weighted</b> | <b>CCB<br/>weighted</b> | <b>Standardised mean<br/>difference (Unweighted)</b> | <b>Standardised mean<br/>difference (weighted)</b> |
|---------------------------------------------|----------------------------------|---------------------------|--------------------------------|-------------------------|------------------------------------------------------|----------------------------------------------------|
| Age                                         | 71.844                           | 72.558                    | 72.635                         | 72.619                  | 0.054                                                | -0.001                                             |
| Male sex (%)                                | 45.7                             | 46.5                      | 46.5                           | 47.2                    | 0.008                                                | 0.007                                              |
| OASIS 3hr score                             | 36.798                           | 35.222                    | 35.999                         | 35.904                  | -0.197                                               | -0.012                                             |
| Beta blocker on admission                   | 46.8                             | 31.2                      | 39.9                           | 37.4                    | -0.156                                               | -0.026                                             |
| Antipsychotic medication on admission       | 5.3                              | 3.5                       | 4.8                            | 4.5                     | -0.018                                               | -0.002                                             |
| Thyroid disorder                            | 2.1                              | 2.1                       | 2.2                            | 2.6                     | 0.000                                                | 0.005                                              |
| COPD                                        | 3.2                              | 13.2                      | 5.8                            | 8.7                     | 0.100                                                | 0.029                                              |
| Liver disease                               | 2.1                              | 1.4                       | 1.2                            | 1.7                     | -0.007                                               | 0.005                                              |
| Plasma sodium concentration (mmol/L)        | 138                              | 140                       | 139                            | 139                     | 0.349                                                | 0.042                                              |
| Plasma potassium concentration (mmol/L)     | 4.1                              | 4.0                       | 4.0                            | 4.0                     | -0.138                                               | -0.002                                             |
| Plasma magnesium concentration (mmol/L)     | 0.85                             | 0.87                      | 0.86                           | 0.86                    | 0.108                                                | 0.000                                              |
| Plasma creatinine concentration (mmol/L)    | 165                              | 124                       | 145                            | 140                     | -0.279                                               | -0.037                                             |
| Plasma urea concentration (micromol/L)      | 12.0                             | 12.1                      | 11.7                           | 12.5                    | 0.008                                                | 0.091                                              |
| White cell count                            | 14.9                             | 12.6                      | 13.8                           | 13.1                    | -0.297                                               | -0.087                                             |
| Haemoglobin concentration (g/L)             | 103                              | 105                       | 104                            | 104                     | 0.104                                                | 0.008                                              |
| Platelet count (x10 <sup>9</sup> / L)       | 207                              | 220                       | 213                            | 212                     | 0.092                                                | -0.005                                             |
| Therapeutic anticoagulation at time of NOAF | 0.064                            | 0.035                     | 0.049                          | 0.043                   | -0.029                                               | -0.006                                             |

|                                                          |       |       |       |       |        |        |
|----------------------------------------------------------|-------|-------|-------|-------|--------|--------|
| Prothrombin time                                         | 15.9  | 15.1  | 15.3  | 15.4  | -0.222 | 0.008  |
| Systolic blood pressure after AF onset (mmHg)            | 106   | 117   | 113   | 113   | 0.315  | -0.005 |
| Mean blood pressure after AF onset (mmHg)                | 67    | 74    | 71    | 72    | 0.332  | 0.049  |
| Heart rate after AF onset                                | 124   | 124   | 124   | 124   | -0.005 | 0.002  |
| Temp ( °C)                                               | 37.0  | 37.1  | 37.0  | 37.1  | 0.026  | 0.025  |
| IV Vasoactive medication at time of NOAF                 | 0.36  | 0.06  | 0.19  | 0.16  | -0.299 | -0.032 |
| Noradrenaline dose (mcg/Kg/min)                          | 0.115 | 0.008 | 0.046 | 0.022 | -0.541 | -0.120 |
| Vasopressin dose (mcg/Kg/min)                            | 0.167 | 0.017 | 0.071 | 0.055 | -0.336 | -0.035 |
| Bronchodilator therapy on day of, or day preceding, NOAF | 35    | 43    | 38    | 39    | 0.079  | 0.012  |
| Mechanical ventilation at time of NOAF                   | 64    | 38    | 50    | 46    | -0.256 | -0.037 |
| Central venous catheter at time of NOAF                  | 73    | 52    | 62    | 60    | -0.213 | -0.020 |
| Renal replacement therapy during or <12h prior to NOAF   | 5     | 1     | 2     | 2     | -0.046 | -0.005 |

*Supplemental Table S4 - Adjusted hazard ratios for calcium channel blockers (versus amiodarone)*

Hospital mortality 1.32 [0.7 - 2.49]

Rate control 0.73 [0.49 - 1.09]

**Rhythm control 0.55 [0.37 - 0.82]**

AF reversion 1.79 [0.91 - 3.53]

**Rate reversion 1.82 [1.10 – 3.00]**

### 3 AMIODARONE VS ELECTRICAL CARADIOVERSION

Supplemental Table S5 - Unweighted and weighted covariate means by treatment group: MIMIC-III database

|                                           | <b>Amiodarone<br/>unweighted</b> | <b>Cardioversion<br/>unweighted</b> | <b>Amiodarone<br/>weighted</b> | <b>Cardioversion<br/>weighted</b> | <b>pairwise standardised<br/>mean difference<br/>(Unweighted)</b> | <b>pairwise standardised<br/>mean difference<br/>(weighted)</b> |
|-------------------------------------------|----------------------------------|-------------------------------------|--------------------------------|-----------------------------------|-------------------------------------------------------------------|-----------------------------------------------------------------|
| Age                                       | 71.8                             | 74.1                                | 72.3                           | 72.2                              | 0.054                                                             | -0.001                                                          |
| Male sex (%)                              | 45.7                             | 65.5                                | 52.4                           | 56.3                              | 0.008                                                             | 0.007                                                           |
| OASIS 3hr score                           | 3679.8                           | 3893.1                              | 3711.7                         | 3750.4                            | -0.197                                                            | -0.012                                                          |
| Beta blocker on admission (%)             | 46.8                             | 55.2                                | 49                             | 50.8                              | -0.156                                                            | -0.026                                                          |
| Antipsychotic medication on admission (%) | 5.3                              | 3.4                                 | 4.2                            | 3.8                               | -0.018                                                            | -0.002                                                          |
| Thyroid disorder (%)                      | 2.1                              | 3.4                                 | 2.5                            | 3.7                               | 0.000                                                             | 0.005                                                           |
| COPD (%)                                  | 3.2                              | 10.3                                | 4.8                            | 8.1                               | 0.100                                                             | 0.029                                                           |
| Liver disease (%)                         | 2.1                              | 0                                   | 1.4                            | 0                                 | -0.007                                                            | 0.005                                                           |
| Plasma sodium concentration (mmol/L)      | 138                              | 139                                 | 138                            | 139                               | 0.349                                                             | 0.042                                                           |
| Plasma potassium concentration (mmol/L)   | 4.1                              | 4                                   | 4.1                            | 4                                 | -0.138                                                            | -0.002                                                          |
| Plasma magnesium concentration (mmol/L)   | 0.85                             | 0.84                                | 0.85                           | 0.84                              | 0.108                                                             | 0.000                                                           |
| Plasma creatinine concentration (mmol/L)  | 165                              | 222                                 | 182                            | 187                               | -0.279                                                            | -0.037                                                          |
| Plasma urea concentration (micromol/L)    | 12                               | 18.9                                | 13.6                           | 16.4                              | 0.008                                                             | 0.091                                                           |
| White cell count                          | 14.9                             | 15.3                                | 14.9                           | 14.6                              | -0.297                                                            | -0.087                                                          |
| Haemoglobin concentration (g/L)           | 103                              | 100                                 | 101                            | 101                               | 0.104                                                             | 0.008                                                           |
| Platelet count (x10 <sup>9</sup> / L)     | 207                              | 182                                 | 196                            | 190                               | 0.092                                                             | -0.005                                                          |

|                                                              |       |       |       |       |        |        |
|--------------------------------------------------------------|-------|-------|-------|-------|--------|--------|
| Therapeutic anticoagulation at time of NOAF                  | 6.4   | 6.9   | 6     | 5.2   | -0.029 | -0.006 |
| Prothrombin time (s)                                         | 15.9  | 16.1  | 16.1  | 16.4  | -0.222 | 0.008  |
| Systolic blood pressure after AF onset (mmHg)                | 106   | 90    | 102   | 97    | 0.315  | -0.005 |
| Mean blood pressure after AF onset (mmHg)                    | 67    | 58    | 64    | 62    | 0.332  | 0.049  |
| Heart rate after AF onset                                    | 124   | 122   | 124   | 124   | -0.005 | 0.002  |
| Temp ( °C)                                                   | 37    | 36.9  | 37    | 37    | 0.026  | 0.025  |
| IV Vasoactive medication at time of NOAF (%)                 | 36.2  | 44.8  | 37.9  | 37.5  | -0.299 | -0.032 |
| Noradrenaline dose (mcg/Kg/min)                              | 0.115 | 0.084 | 0.1   | 0.066 | -0.541 | -0.120 |
| Vasopressin dose (mcg/Kg/min)                                | 0.167 | 0.29  | 0.216 | 0.257 | -0.336 | -0.035 |
| Bronchodilator therapy on day of, or day preceding, NOAF (%) | 35.1  | 27.6  | 32.5  | 29.2  | 0.079  | 0.012  |
| Mechanical ventilation at time of NOAF (%)                   | 63.8  | 75.9  | 65.6  | 67.9  | -0.256 | -0.037 |
| Central venous catheter at time of NOAF (%)                  | 73.4  | 82.8  | 76.6  | 77.9  | -0.213 | -0.020 |
| Renal replacement therapy during or <12h prior to NOAF (%)   | 5.3   | 10.3  | 6.5   | 8     | -0.046 | -0.00  |



*Supplemental Table S6 - Adjusted hazard ratios for electrical cardioversion (versus amiodarone)*

Hospital mortality 1.08 [0.5 - 2.36]

Rate control 1.04 [0.34 - 3.19]

Rhythm control 1.70 [0.84 - 3.41]

AF reversion 1.60 [0.62 - 4.1]

Rate reversion 0.55 [0.2 - 1.56]

# Sensitivity analysis – PICRAM database

## 4 AMIODARONE VS BETA BLOCKERS

*Supplemental Table S7 - Unweighted and weighted covariate means by treatment group: PICRAM database*

|                                              | Amiodarone<br>unweighted | Beta blocker<br>unweighted | Amiodarone<br>weighted | Beta blocker<br>weighted | pairwise standardised<br>mean difference<br>(Unweighted) | pairwise standardised<br>mean difference<br>(weighted) |
|----------------------------------------------|--------------------------|----------------------------|------------------------|--------------------------|----------------------------------------------------------|--------------------------------------------------------|
| Age                                          | 68.6                     | 68.9                       | 68.7                   | 68.5                     | 0.030                                                    | -0.012                                                 |
| Male sex (%)                                 | 59.0                     | 57.4                       | 58.7                   | 58.3                     | -0.016                                                   | -0.004                                                 |
| OASIS 3hr score                              | 33.767                   | 31.170                     | 33.374                 | 33.077                   | -0.281                                                   | -0.032                                                 |
| Beta blocker on admission<br>(%)             | 12.8                     | 21.3                       | 14.5                   | 16.5                     | 0.085                                                    | 0.019                                                  |
| Antipsychotic medication on<br>admission (%) | 1.5                      | 2.1                        | 1.7                    | 2.2                      | 0.007                                                    | 0.005                                                  |
| Thyroid disorder (%)                         | 6.1                      | 6.4                        | 6.5                    | 6.5                      | 0.003                                                    | 0.000                                                  |
| COPD (%)                                     | 14.8                     | 2.1                        | 11                     | 5                        | -0.127                                                   | -0.059                                                 |
| Liver disease (%)                            | 4.1                      | 2.1                        | 3.6                    | 3.1                      | -0.019                                                   | -0.005                                                 |
| NYHA class III/IV heart<br>failure (%)       | 0.6                      | 0                          | 0.4                    | 0                        | -0.006                                                   | -0.004                                                 |
| Dialysis-dependent renal<br>failure (%)      | 1.7                      | 0                          | 1.1                    | 0                        | -0.017                                                   | -0.011                                                 |
| Plasma sodium<br>concentration (mmol/L)      | 138                      | 140                        | 138                    | 139                      | 0.404                                                    | 0.142                                                  |
| Plasma potassium<br>concentration (mmol/L)   | 4.2                      | 4.3                        | 4.3                    | 4.3                      | 0.113                                                    | 0.038                                                  |
| Plasma magnesium<br>concentration (mmol/L)   | 0.99                     | 1.02                       | 1.00                   | 1.01                     | 0.130                                                    | 0.034                                                  |

|                                                              |       |       |       |       |        |        |
|--------------------------------------------------------------|-------|-------|-------|-------|--------|--------|
| Plasma creatinine concentration (mmol/L)                     | 170   | 134   | 164   | 160   | -0.286 | -0.030 |
| Plasma urea concentration (micromol/L)                       | 16.0  | 13.3  | 15.4  | 14.5  | -0.271 | -0.090 |
| White cell count                                             | 12.7  | 11.1  | 12.3  | 11.9  | -0.226 | -0.067 |
| Haemoglobin concentration (g/L)                              | 101   | 104   | 101   | 102   | 0.214  | 0.040  |
| Platelet count (x10 <sup>9</sup> / L)                        | 182   | 192   | 187   | 193   | 0.090  | 0.057  |
| Therapeutic anticoagulation at time of NOAF                  | 0.11  | 0.11  | 0.12  | 0.14  | -0.001 | 0.019  |
| Prothrombin time (s)                                         | 18.3  | 16.2  | 17.6  | 16.5  | -0.36  | -0.19  |
| Systolic blood pressure after AF onset                       | 117   | 124   | 119   | 120   | 0.209  | 0.044  |
| Mean blood pressure after AF onset                           | 75    | 80    | 76    | 78    | 0.248  | 0.061  |
| Heart rate after AF onset                                    | 125   | 129   | 126   | 127   | 0.127  | 0.035  |
| Temp (°C)                                                    | 36.6  | 36.8  | 36.7  | 36.8  | 0.290  | 0.119  |
| IV Vasoactive medication at time of NOAF                     | 0.31  | 0.13  | 0.27  | 0.23  | -0.178 | -0.038 |
| Noradrenaline dose (mcg/Kg/min)                              | 0.064 | 0.035 | 0.058 | 0.056 | -0.232 | -0.024 |
| Vasopressin dose (mcg/Kg/min)                                | 0.049 | 0.000 | 0.030 | 0.000 | -0.239 | -0.148 |
| Bronchodilator therapy on day of, or day preceding, NOAF (%) | 17    | 15    | 17    | 17    | -0.017 | 0.006  |
| Mechanical ventilation at time of NOAF (%)                   | 56    | 47    | 55    | 55    | -0.090 | 0.005  |
| Central venous catheter at time of NOAF (%)                  | 76    | 68    | 75    | 76    | -0.081 | 0.008  |
| Renal replacement therapy during or <12h prior to NOAF (%)   | 15    | 11    | 15    | 14    | -0.045 | -0.001 |

*Supplemental Table S8 - Adjusted hazard ratios for beta blockers (versus amiodarone)*

Hospital mortality 0.73 [0.29 - 1.8]

Rate control 0.88 [0.51 - 1.52]

Rhythm control 1.07 [0.59 - 1.94]

AF reversion 0.86 [0.42 - 1.77]

Rate reversion 0.98 [0.47 - 2.01]

## 5 AMIODARONE VS DIGOXIN

Supplemental Table S9 - Unweighted and weighted covariate means by treatment group: MIMIC-III database

|                                              | <b>Amiodarone<br/>unweighted</b> | <b>Digoxin<br/>unweighted</b> | <b>Amiodarone<br/>weighted</b> | <b>Digoxin<br/>weighted</b> | <b>pairwise standardised<br/>mean difference<br/>(Unweighted)</b> | <b>pairwise standardised<br/>mean difference<br/>(weighted)</b> |
|----------------------------------------------|----------------------------------|-------------------------------|--------------------------------|-----------------------------|-------------------------------------------------------------------|-----------------------------------------------------------------|
| Age                                          | 68.6                             | 71.8                          | 69.5                           | 70.0                        | 0.28                                                              | 0.05                                                            |
| Male sex                                     | 0.59                             | 0.64                          | 0.61                           | 0.62                        | 0.05                                                              | 0.01                                                            |
| OASIS 3hr score                              | 33.8                             | 29.8                          | 33.0                           | 32.1                        | -0.43                                                             | -0.09                                                           |
| Beta blocker on admission<br>(%)             | 13                               | 13                            | 13                             | 14                          | 0.00                                                              | 0.01                                                            |
| Antipsychotic medication on<br>admission (%) | 1                                | 1                             | 1                              | 1                           | 0.00                                                              | 0.00                                                            |
| Thyroid disorder (%)                         | 6                                | 6                             | 6                              | 7                           | 0.00                                                              | 0.01                                                            |
| COPD (%)                                     | 15                               | 16                            | 15                             | 15                          | 0.01                                                              | 0.00                                                            |
| Liver disease (%)                            | 4                                | 7                             | 5                              | 5                           | 0.03                                                              | 0.01                                                            |
| NYHA class III/IV heart failure<br>(%)       | 1                                | 0                             | 0                              | 0                           | -0.01                                                             | 0.00                                                            |
| Dialysis-dependent renal<br>failure (%)      | 2                                | 1                             | 2                              | 2                           | 0.00                                                              | 0.00                                                            |
| Plasma sodium<br>concentration (mmol/L)      | 138                              | 138                           | 138                            | 138                         | 0.09                                                              | 0.04                                                            |
| Plasma potassium<br>concentration (mmol/L)   | 4.24                             | 4.20                          | 4.23                           | 4.24                        | -0.07                                                             | 0.00                                                            |
| Plasma magnesium<br>concentration (mmol/L)   | 0.99                             | 0.95                          | 0.99                           | 0.98                        | -0.16                                                             | -0.04                                                           |

|                                                              |      |      |      |      |       |       |
|--------------------------------------------------------------|------|------|------|------|-------|-------|
| Plasma creatinine concentration (mmol/L)                     | 170  | 153  | 166  | 164  | -0.14 | -0.01 |
| Plasma urea concentration (micromol/L)                       | 15.9 | 14.1 | 15.2 | 14.5 | -0.20 | -0.09 |
| White cell count                                             | 12.5 | 12.4 | 12.5 | 12.3 | -0.01 | -0.03 |
| Haemoglobin concentration (g/L)                              | 100  | 105  | 101  | 102  | 0.25  | 0.03  |
| Platelet count ( $\times 10^9 / L$ )                         | 180  | 214  | 188  | 196  | 0.27  | 0.07  |
| Therapeutic anticoagulation at time of NOAF (%)              | 11   | 9    | 11   | 11   | -0.02 | 0.00  |
| Prothrombin time                                             | 18.3 | 20.2 | 18.8 | 19.3 | 0.19  | 0.05  |
| Systolic blood pressure after AF onset                       | 117  | 120  | 118  | 119  | 0.07  | 0.02  |
| Mean blood pressure after AF onset                           | 75   | 78   | 76   | 77   | 0.14  | 0.06  |
| Heart rate after AF onset                                    | 125  | 118  | 124  | 124  | -0.29 | 0.00  |
| Temp ( $^{\circ}C$ )                                         | 36.6 | 36.5 | 36.6 | 36.6 | -0.05 | -0.01 |
| IV Vasoactive medication at time of NOAF                     | 0.31 | 0.19 | 0.28 | 0.26 | -0.12 | -0.02 |
| Noradrenaline dose (mcg/Kg/min)                              | 0.06 | 0.04 | 0.06 | 0.06 | -0.15 | 0.02  |
| Vasopressin dose (mcg/Kg/min)                                | 0.05 | 0.00 | 0.03 | 0.00 | -0.24 | -0.14 |
| Bronchodilator therapy on day of, or day preceding, NOAF (%) | 17   | 16   | 17   | 16   | -0.01 | 0.00  |
| Mechanical ventilation at time of NOAF (%)                   | 56   | 42   | 53   | 51   | -0.14 | -0.02 |
| Central venous catheter at time of NOAF (%)                  | 76   | 46   | 70   | 65   | -0.30 | -0.05 |
| Renal replacement therapy during or <12h prior to NOAF (%)   | 15   | 12   | 14   | 13   | -0.04 | -0.01 |

*Supplemental Table S10 - Adjusted hazard ratios for digoxin (versus amiodarone)*

Hospital mortality 1.33 [0.77 - 2.29]

**Rate control 0.56 [0.36 - 0.88]**

Rhythm control 0.66 [0.42 - 1.03]

**AF reversion 1.31 [0.74 - 2.31]**

Rate reversion 1.13 [0.65 - 1.96]

# Array sensitivity analyses

## 6 INFERIOR RATE CONTROL ASSOCIATED WITH DIGOXIN THERAPY

*Supplemental Table S11 - Examples of minimum required confounder-outcome association and confounder prevalence combinations required for an unmeasured confounder to bring the observed effect estimate to the null*

| Association of confounder with outcome (hazard ratio) | Prevalence of confounder in digoxin group | Prevalence of confounder in amiodarone group |
|-------------------------------------------------------|-------------------------------------------|----------------------------------------------|
| 0.15                                                  | 0.70                                      | 0.3                                          |
| 0.20                                                  | 0.75                                      | 0.3                                          |
| 0.25                                                  | 0.80                                      | 0.3                                          |
| 0.30                                                  | 0.85                                      | 0.3                                          |
| 0.35                                                  | 0.90                                      | 0.3                                          |
| 0.40                                                  | 0.95                                      | 0.3                                          |
| 0.45                                                  | 1.00                                      | 0.3                                          |

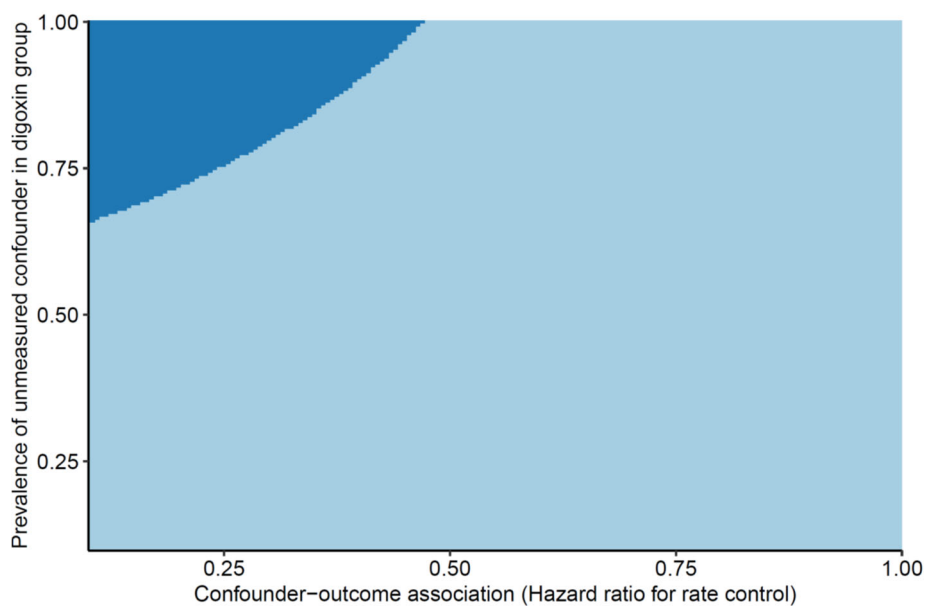

*Supplemental Figure 1 - Graphical representation of confounder-outcome association and confounder prevalence combinations required to bring the observed effect estimate to the null assuming a prevalence of the unmeasured confounder of 0.3 in the reference (amiodarone) group. Dark blue represents combinations where the observed effect estimate would be brought to the null by an unmeasured confounder.*



## 7 INFERIOR RHYTHM CONTROL ASSOCIATED WITH CCB THERAPY

*Supplemental Table S12 - Examples of minimum required confounder-outcome association and confounder prevalence combinations required for an unmeasured confounder to bring the observed effect estimate to the null assuming a prevalence of the unmeasured confounder of 0.3 in the reference (amiodarone) group.*

| Association of confounder with outcome (hazard ratio) | Prevalence of confounder in CCB group | Prevalence of confounder in amiodarone group |
|-------------------------------------------------------|---------------------------------------|----------------------------------------------|
| 0.10                                                  | 0.65                                  | 0.3                                          |
| 0.15                                                  | 0.70                                  | 0.3                                          |
| 0.20                                                  | 0.70                                  | 0.3                                          |
| 0.25                                                  | 0.75                                  | 0.3                                          |
| 0.30                                                  | 0.80                                  | 0.3                                          |
| 0.35                                                  | 0.85                                  | 0.3                                          |
| 0.40                                                  | 0.90                                  | 0.3                                          |
| 0.45                                                  | 0.95                                  | 0.3                                          |
| 0.50                                                  | 1.00                                  | 0.3                                          |

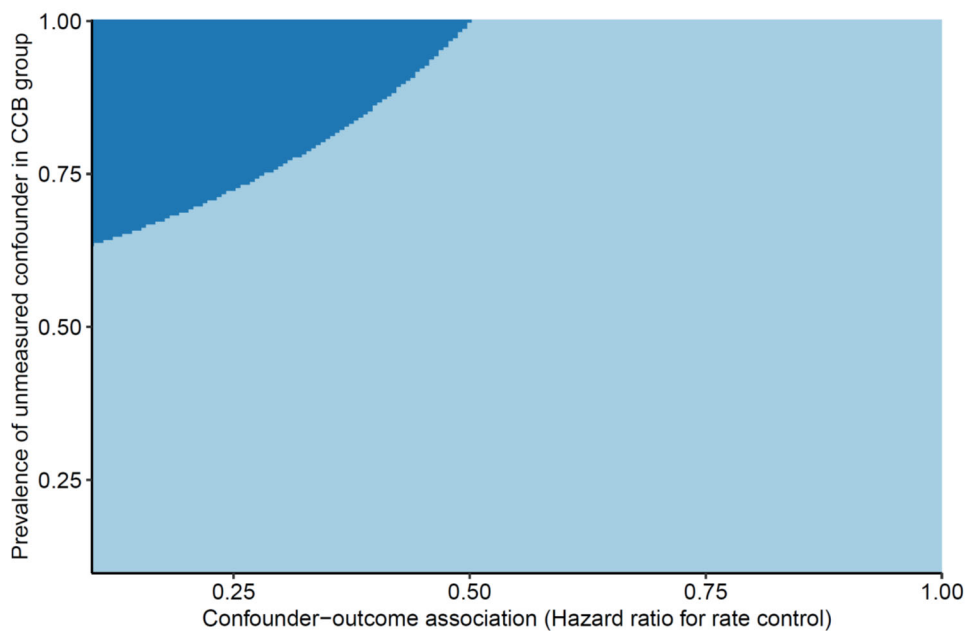

*Supplemental Figure 2 - Graphical representation of confounder-outcome association and confounder prevalence combinations required to bring the observed effect estimate to the null assuming a prevalence of the unmeasured confounder of 0.3 in the reference (amiodarone) group. Dark blue represents combinations where the observed effect estimate would be brought to the null by an unmeasured confounder.*
